# Supplementary material for: Organ geometry channels reproductive cell fate in the Arabidopsis ovule primordium
Source: eLife journal article supplement (doi:10.7554/elife.66031), 2021-05-07

**Supplemental Dataset 1- Gallery of wild-type (Col\_0) ovules used for the 3D digital atlas related to Figure 1**

**Number of ovules segmented for the analysis: 92 *from 84 images***

|             |      |
|-------------|------|
| Stage 0-I   | n=21 |
| Stage 0-II  | n=17 |
| Stage 0-III | n=11 |
| Stage 1-I   | n=15 |
| Stage 1-II  | n=11 |
| Stage 2-I   | n=10 |
| Stage 2-II  | n=7  |

# Stage 0-I (1/2)

EM\_C\_25

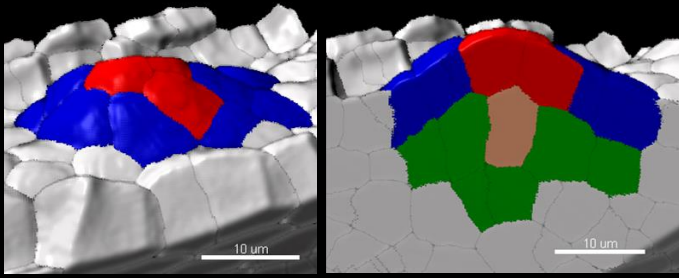

EM\_C\_149

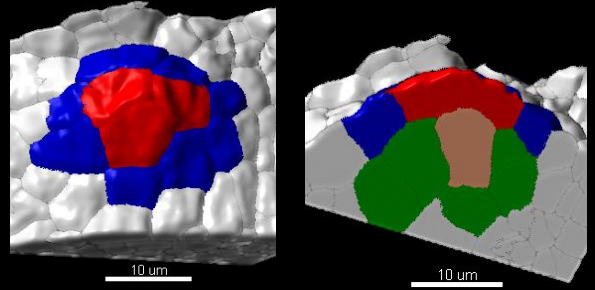

EM\_C\_58

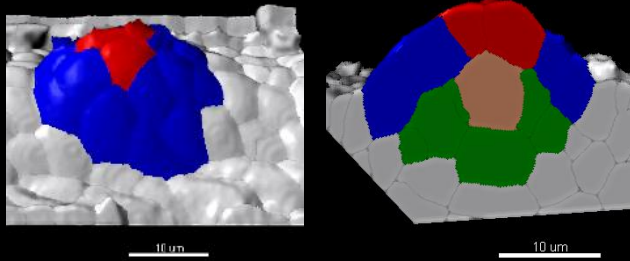

EM\_C\_237

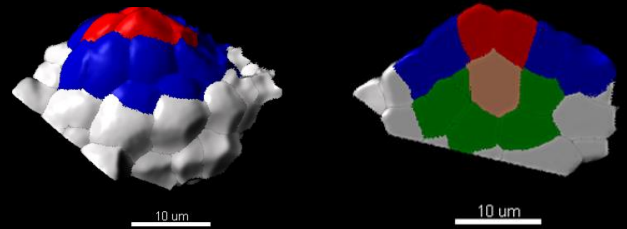

EM\_C\_59

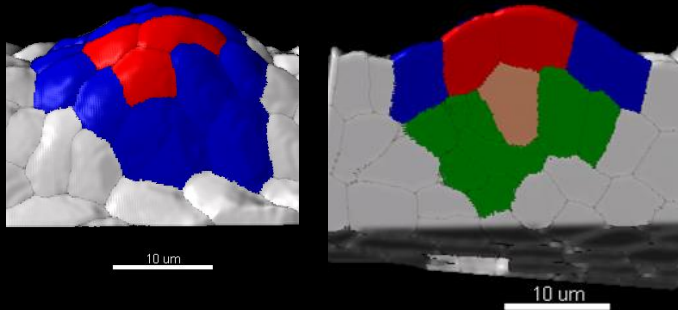

EM\_C\_240

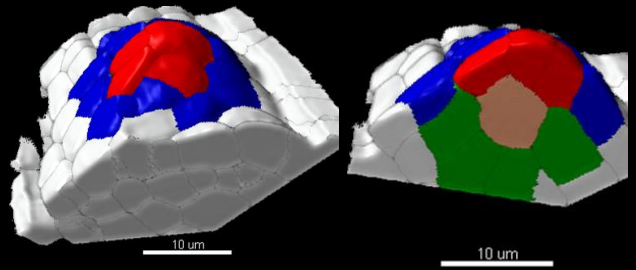

EM\_C\_60

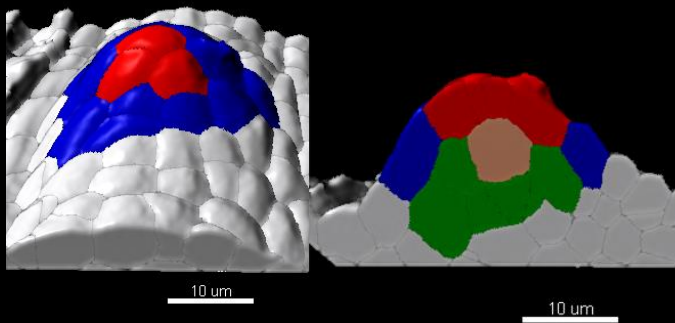

EM\_C\_241

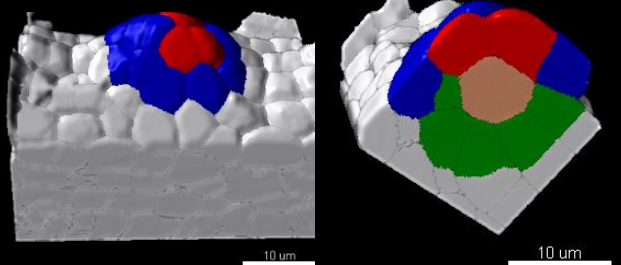

EM\_C\_76

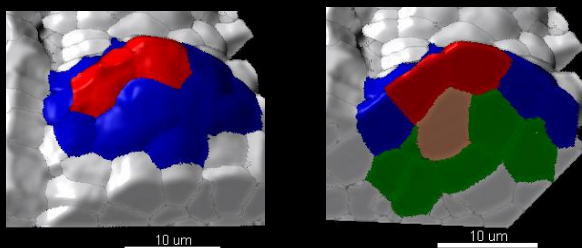

EM\_C\_242A

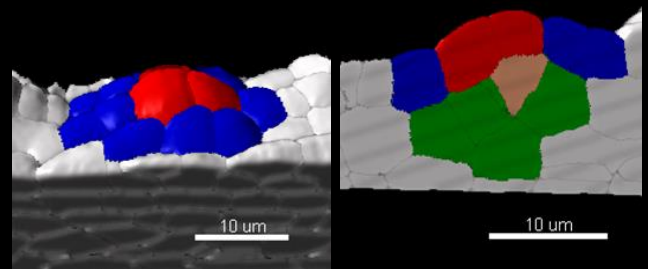

## Stage 0-I (2/2)

EM\_C\_243A

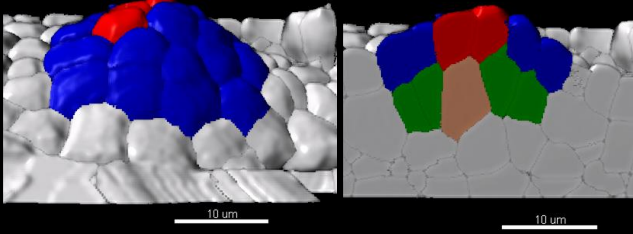

EM\_C\_245

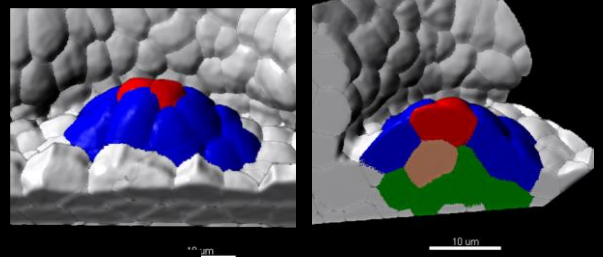

EM\_C\_243B

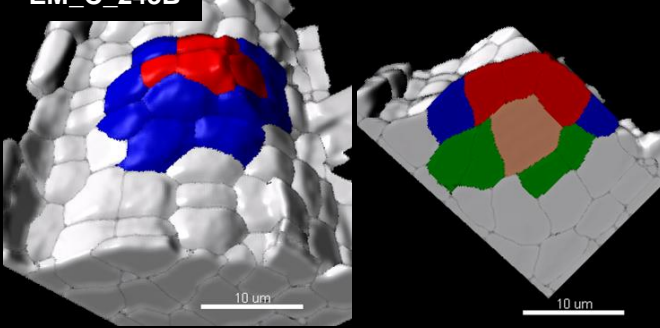

EM\_C\_377

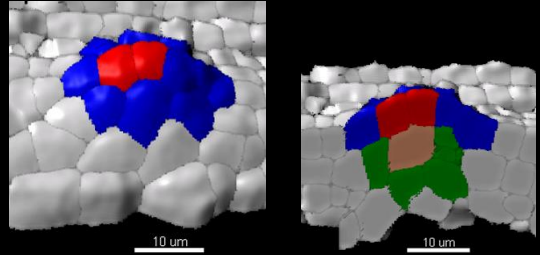

EM\_C\_244A

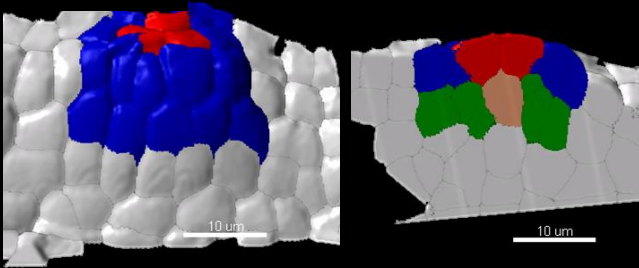

EM\_C\_378

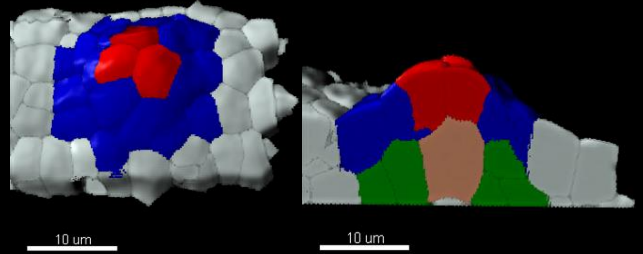

EM\_C\_354\_A

EM\_C\_354\_B

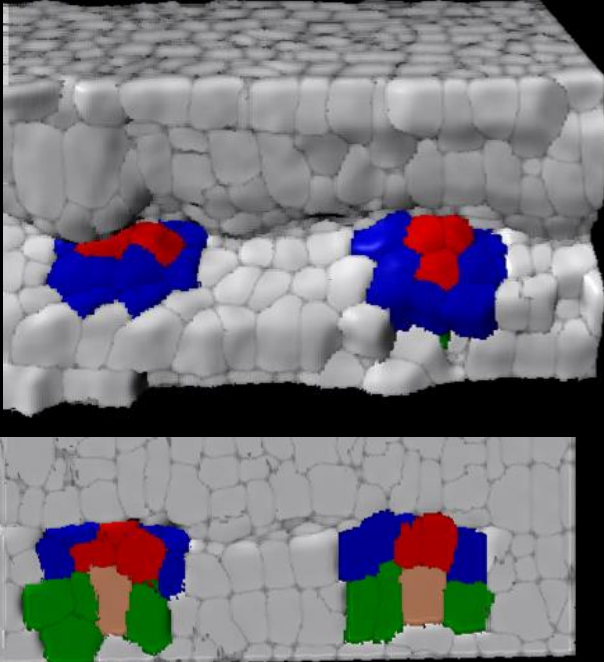

EM\_C\_595

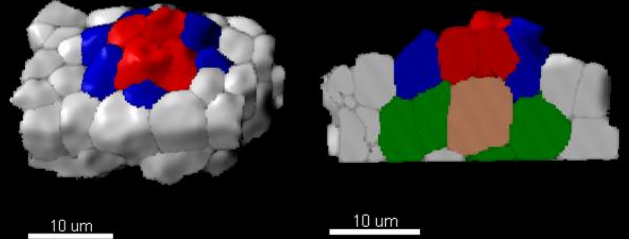

EM\_C\_596

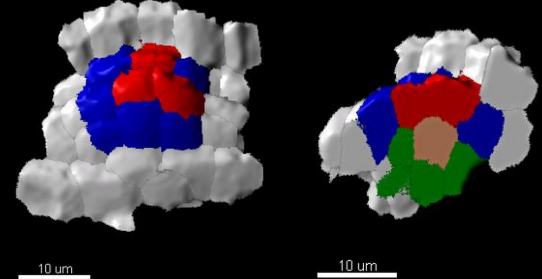

EM\_C\_597

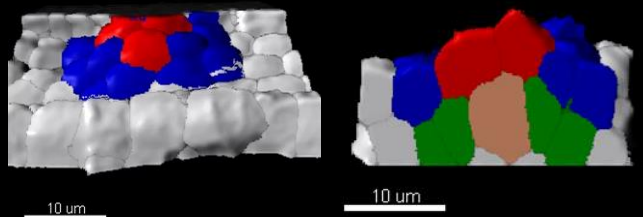

# Stage 0-II (1/2)

EM\_C\_22

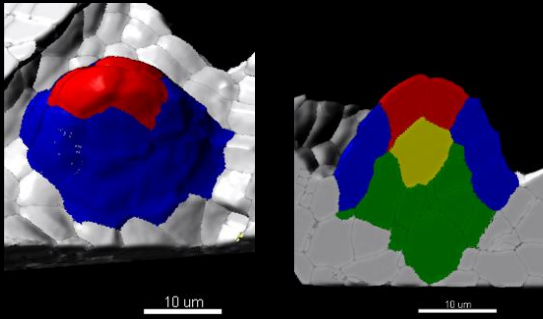

EM\_C\_77

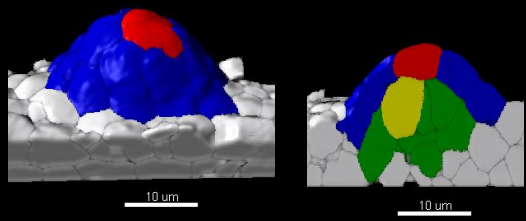

EM\_C\_78

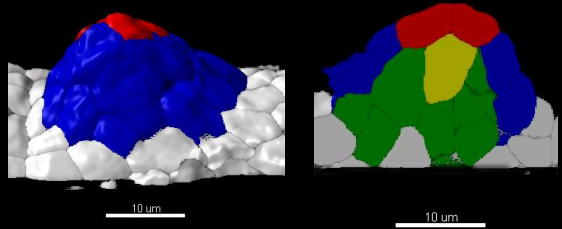

EM\_C\_57

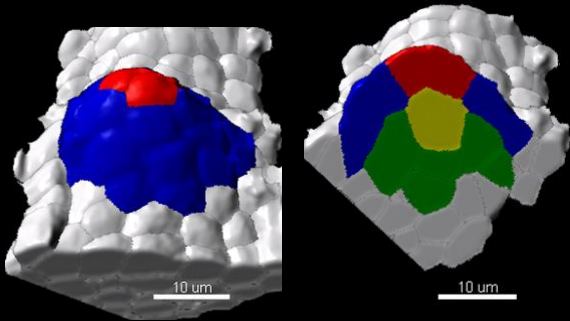

EM\_C\_146

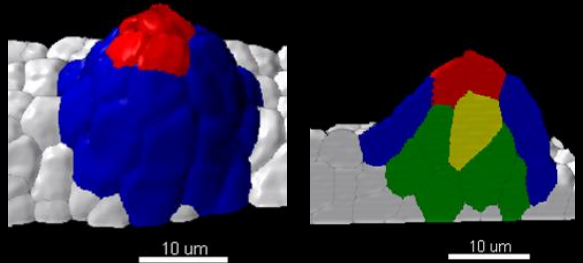

EM\_C\_61

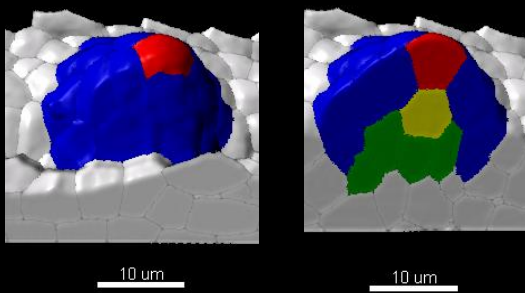

EM\_C\_148

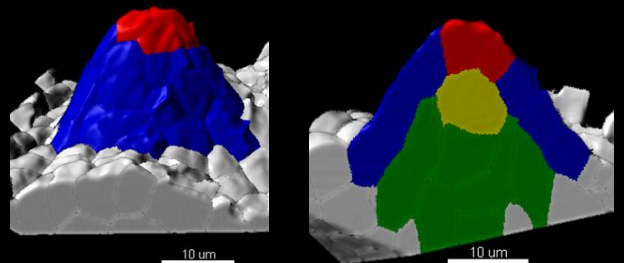

EM\_C\_75

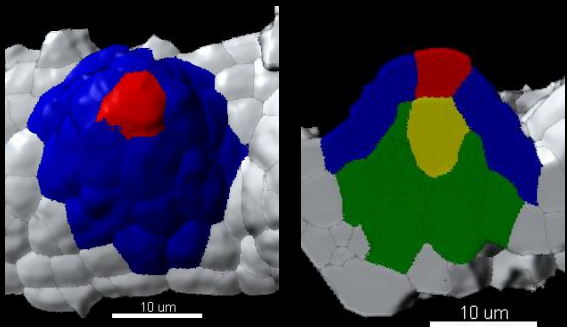

EM\_C\_150

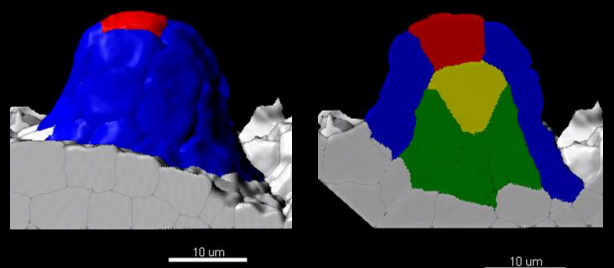

EM\_C\_211

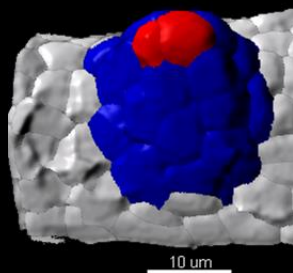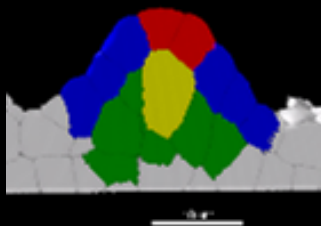

EM\_C\_214

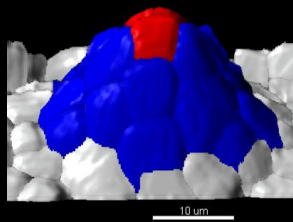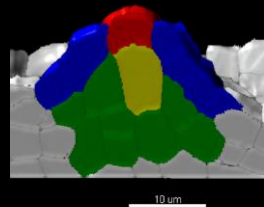

EM\_C\_212A

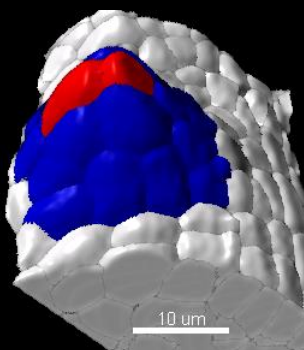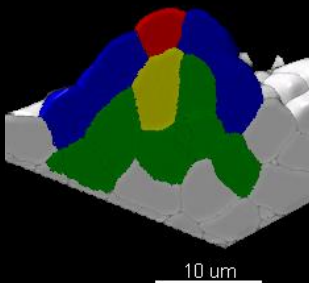

EM\_C\_238

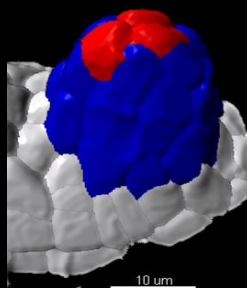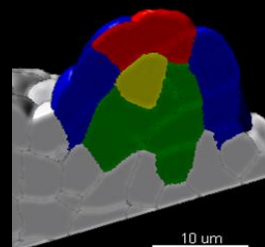

EM\_C\_212B

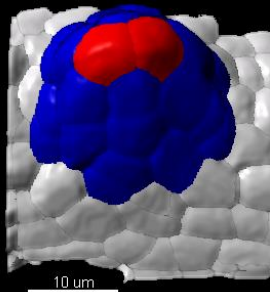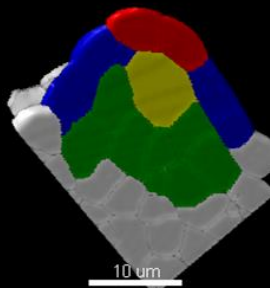

EM\_C\_239

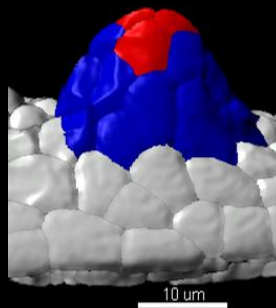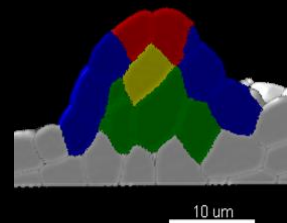

EM\_C\_213

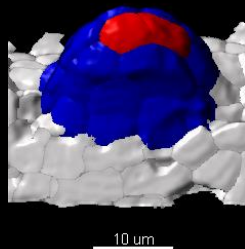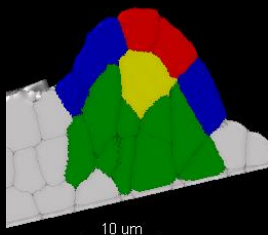

EM\_C\_246

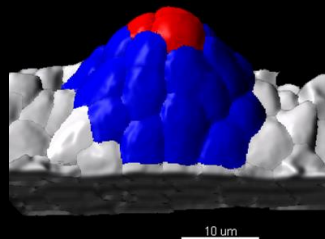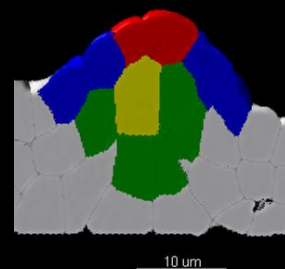

Stage 0-III

EM\_C\_136

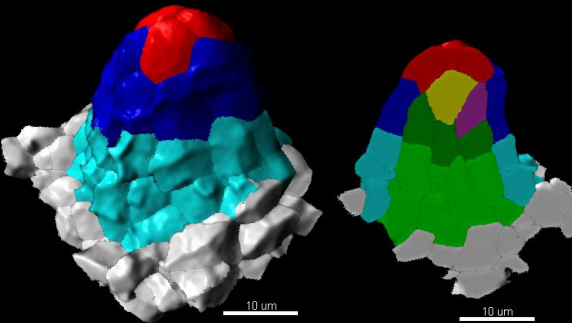

EM\_C\_141

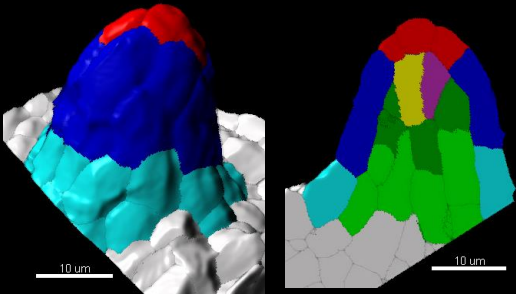

EM\_C\_138

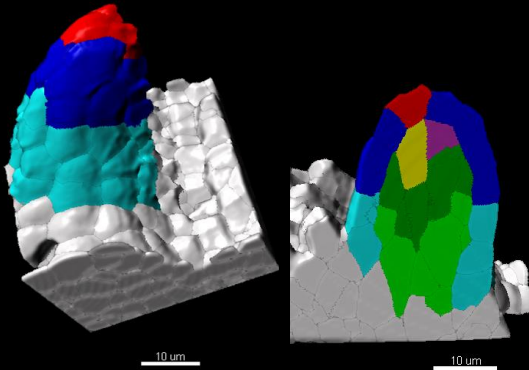

EM\_C\_142

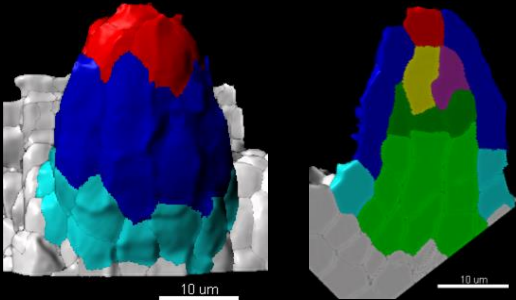

EM\_C\_139

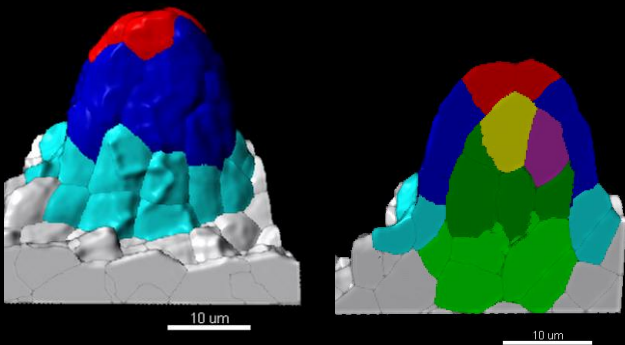

EM\_C\_187

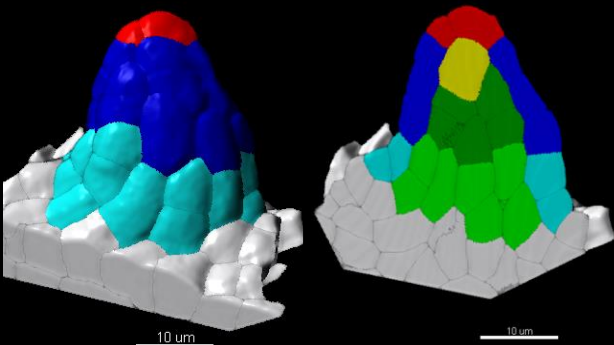

EM\_C\_140

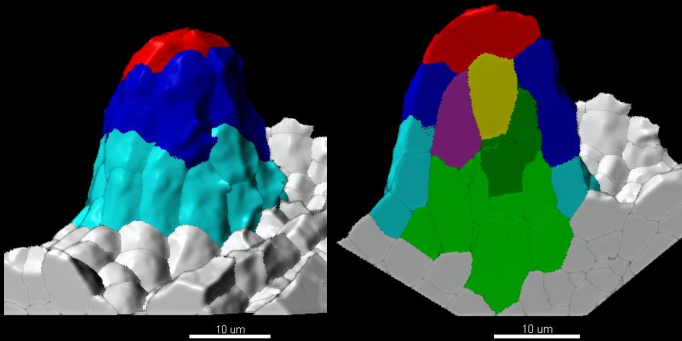

EM\_C\_403

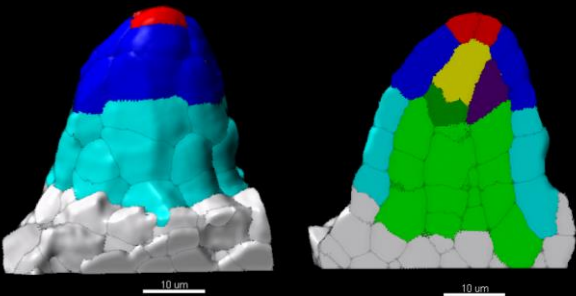

## Stage 1-I (1/2)

**EM\_C\_6**

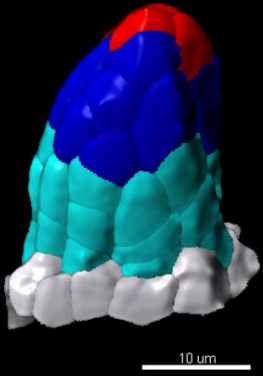

**EM\_C\_189**

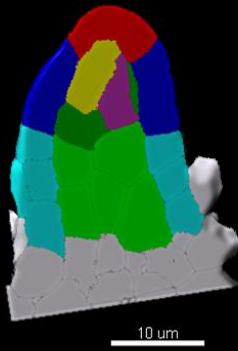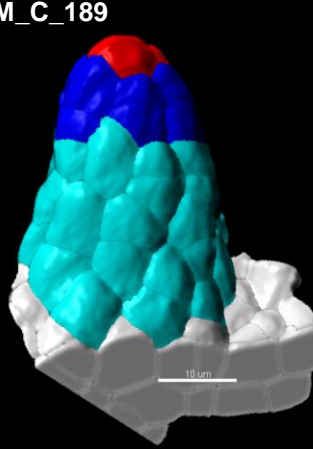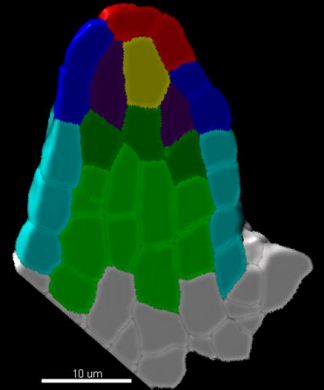

**EM\_C\_185**

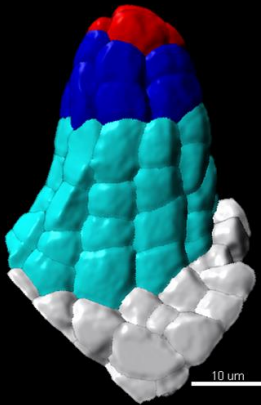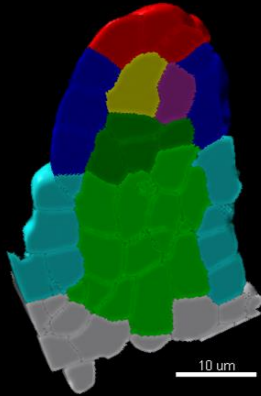

**EM\_C\_196**

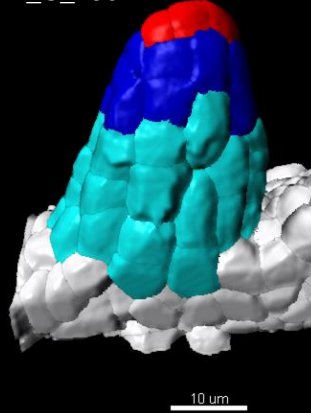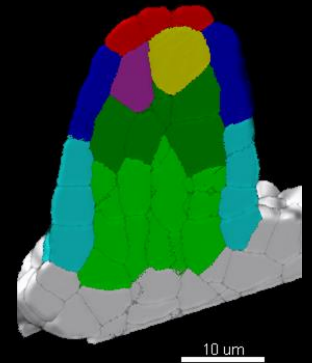

**EM\_C\_186**

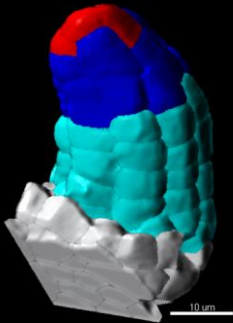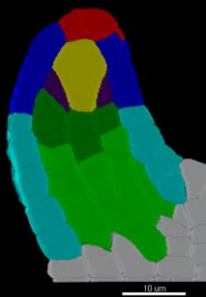

**EM\_C\_198**

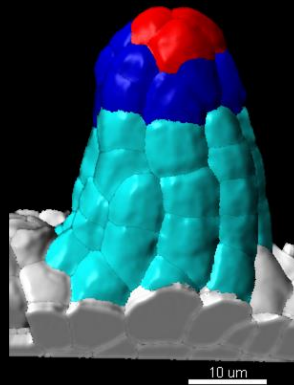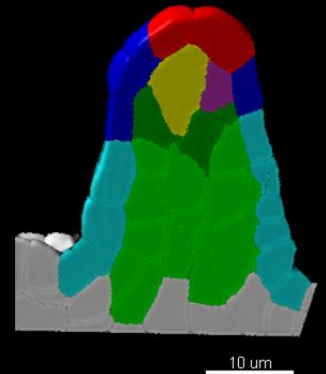

**EM\_C\_188**

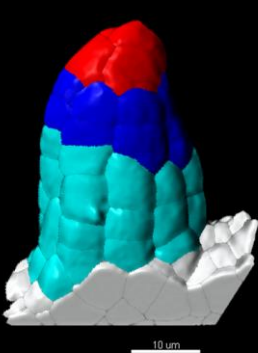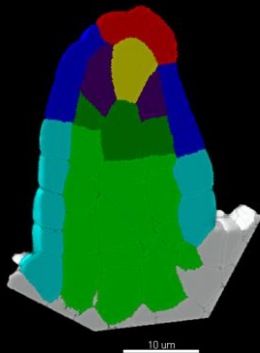

**EM\_C\_200**

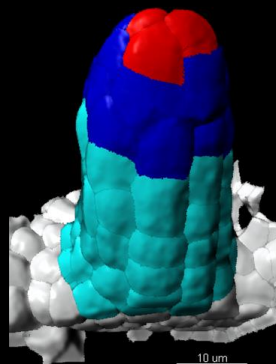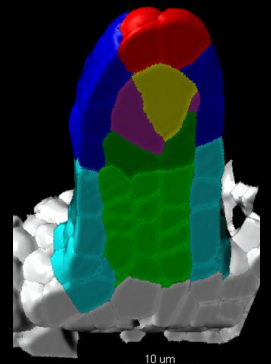

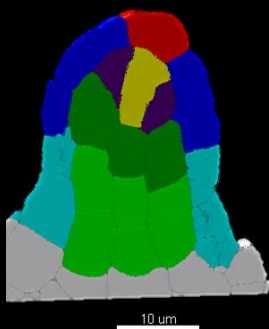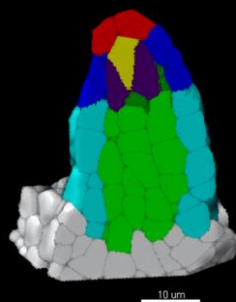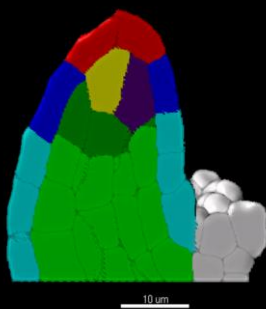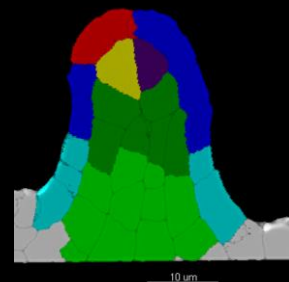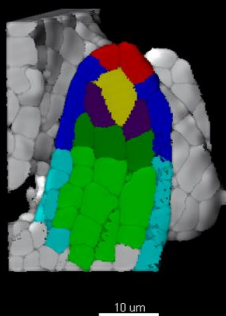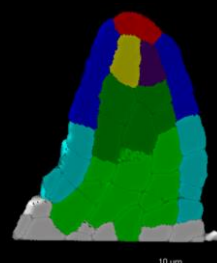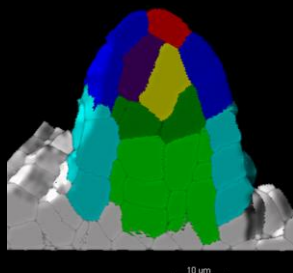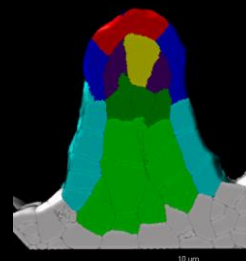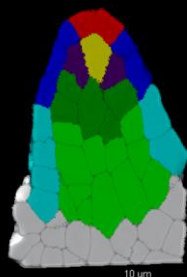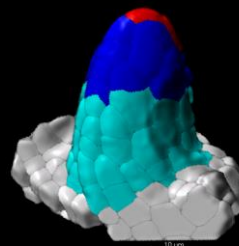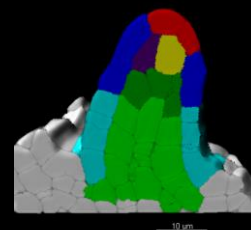

**Stage 1-II (1/2)**

**EM\_C\_96**

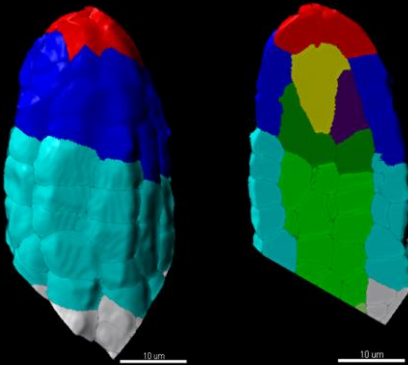

**EM\_C\_184**

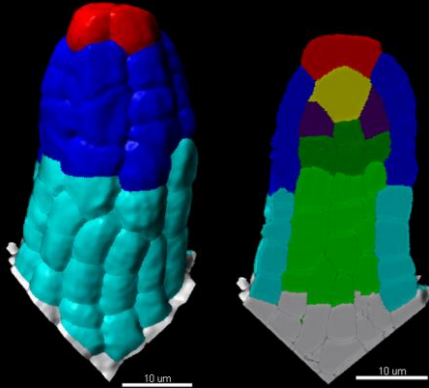

**EM\_C\_102A**

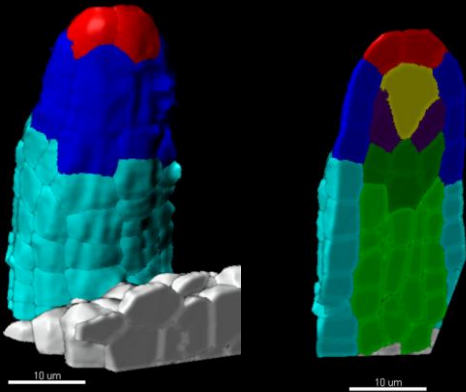

**EM\_C\_199**

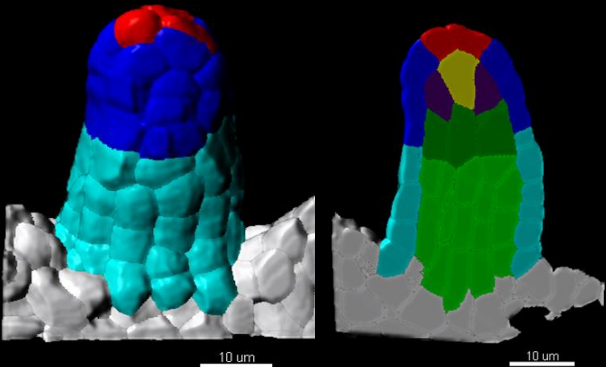

**EM\_C\_112**

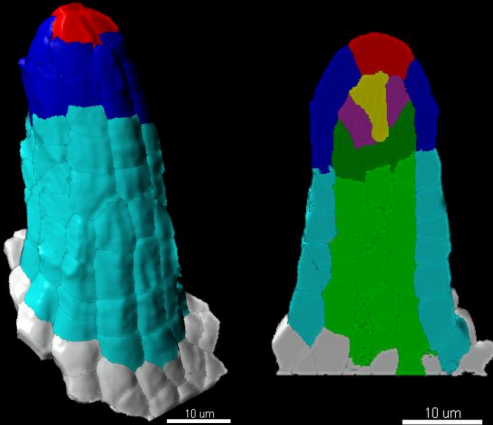

**EM\_C\_201**

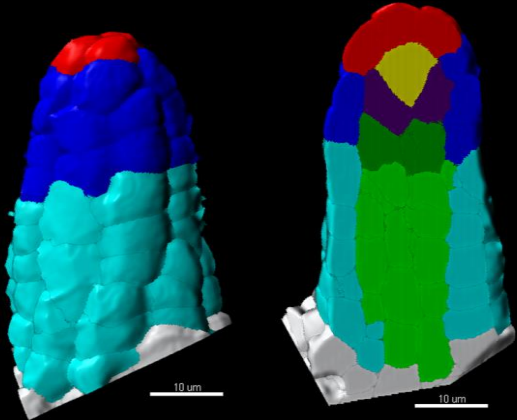

**EM\_C\_162**

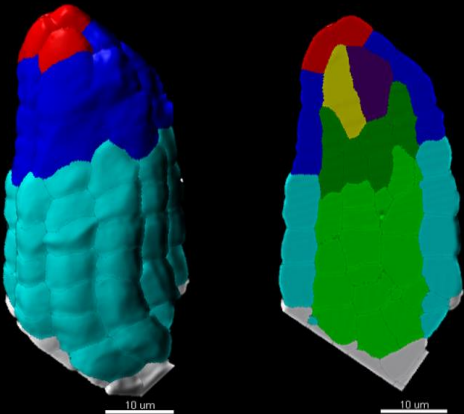

**EM\_C\_204**

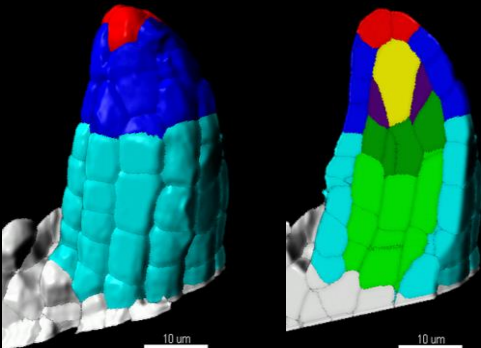

Stage 1-II (2/2)

EM\_C\_359B

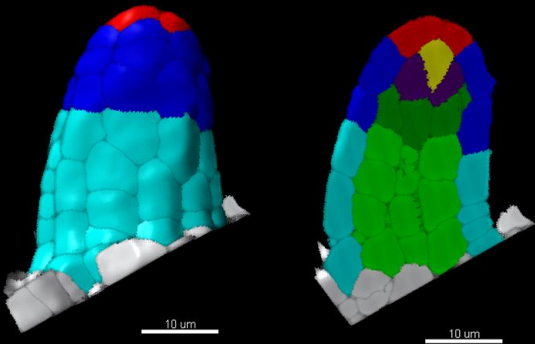

EM\_C\_607

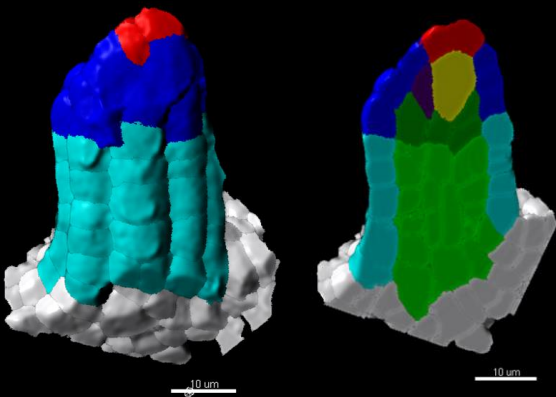

EM\_C\_160

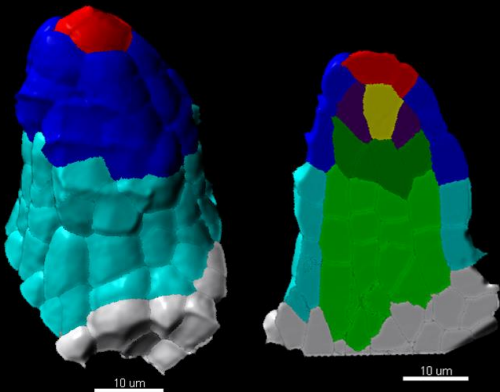

Stage 2-I

EM\_C\_130

EM\_C\_101

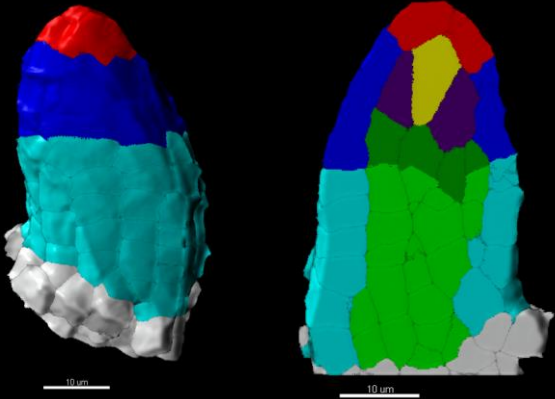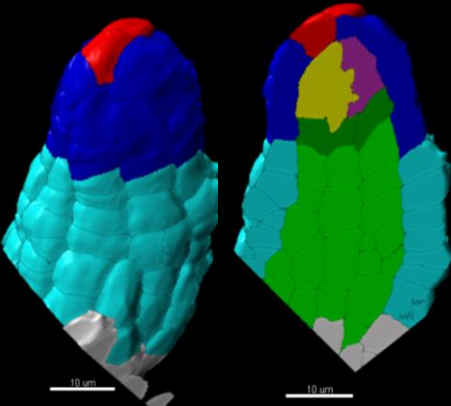

EM\_C\_159

EM\_C\_102B

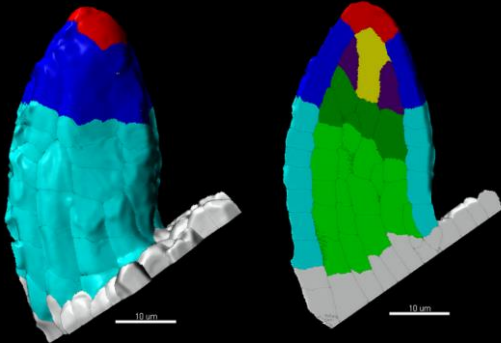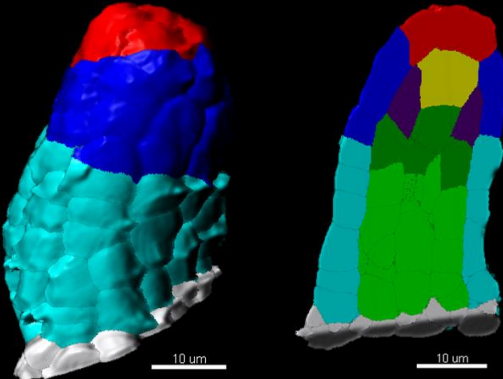

EM\_C\_161

EM\_C\_113

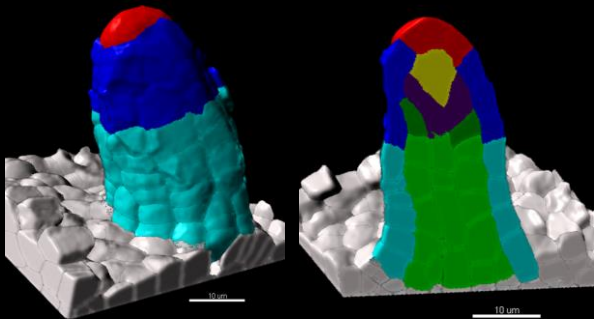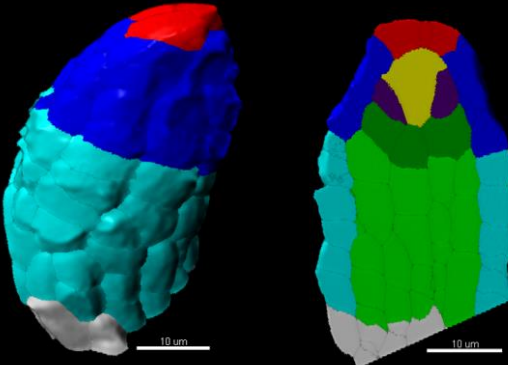

EM\_C\_191

EM\_C\_157

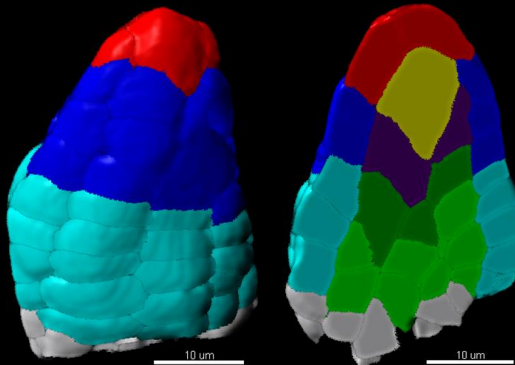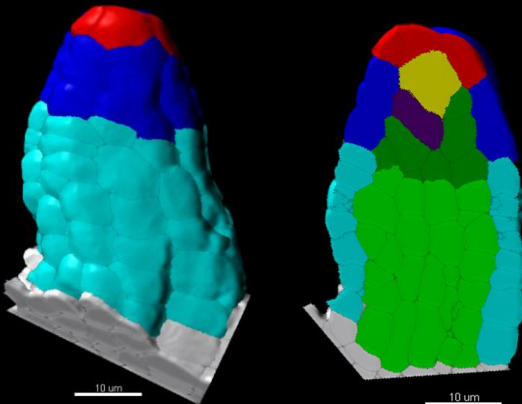

Stage 2-I

EM\_C\_229

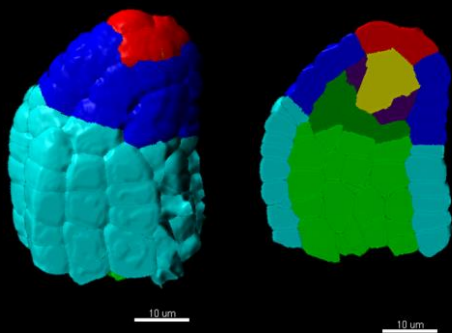

EM\_C\_232

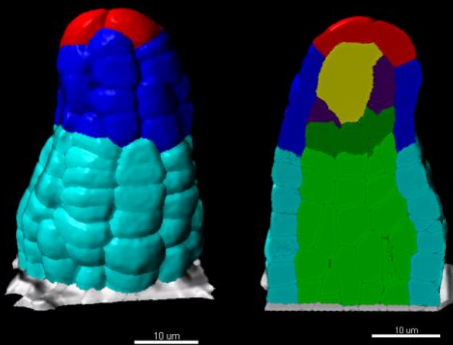

EM\_C\_81

Stage 2-II

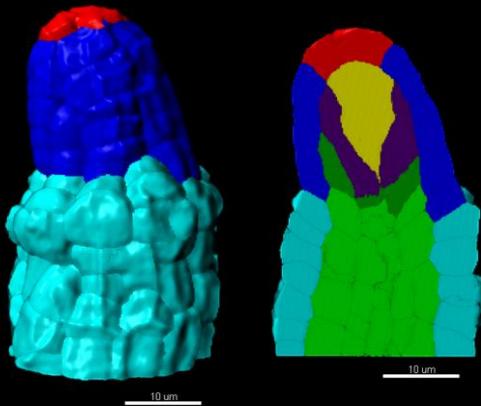

EM\_C\_230

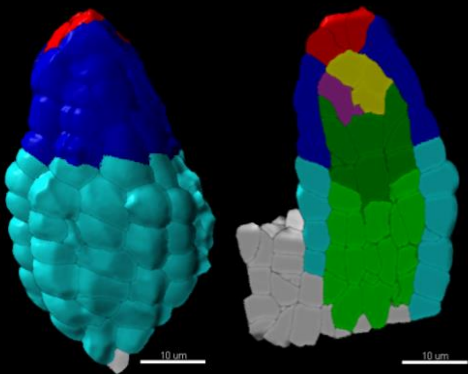

EM\_C\_128

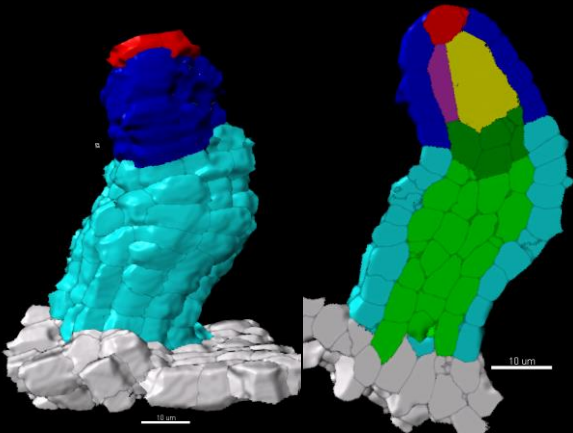

EM\_C\_254

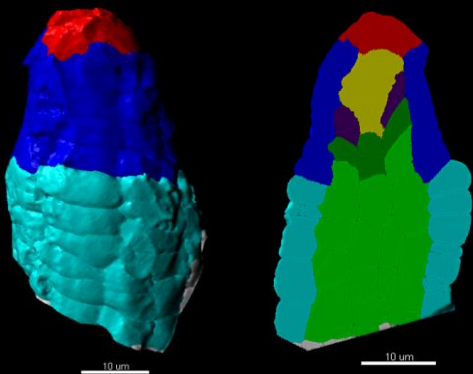

EM\_C\_129

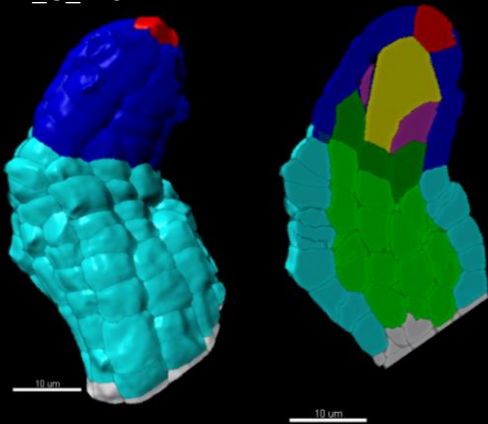

EM\_C\_352

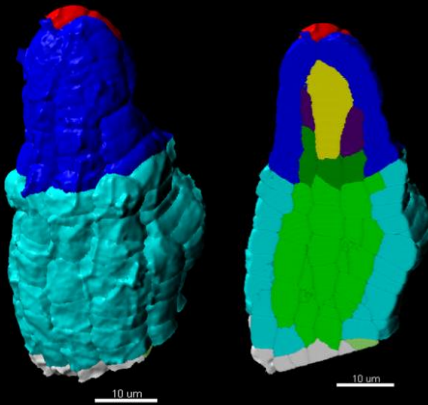

EM\_C\_132

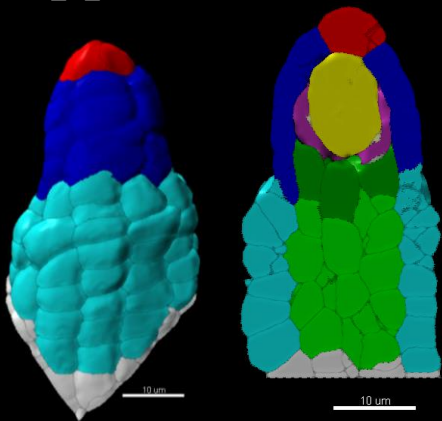

Supplement: supp [file elife-66031-supp-v1.zip › elife_poa_e66031_Figure_1_source_data_1.pdf]
