# Supplementary material for: Organ geometry channels reproductive cell fate in the Arabidopsis ovule primordium
Source: eLife journal article supplement (doi:10.7554/elife.66031), 2021-05-07

**Supplemental Dataset 4a- Gallery of *katanin* (*bot1-7*) and corresponding wild-type (*Ws-4*) ovules used for the 3D digital atlas related to Figure 4**

**Number of ovules segmented for the analysis**

|             | <i>bot1-7</i> | <i>Ws-4</i> |
|-------------|---------------|-------------|
| Stage 0-III | n=16          | n=7         |
| Stage 1-I   | n=9           | n=8         |
| Stage 1-II  | n=12          | n=7         |

**EM\_C\_746**

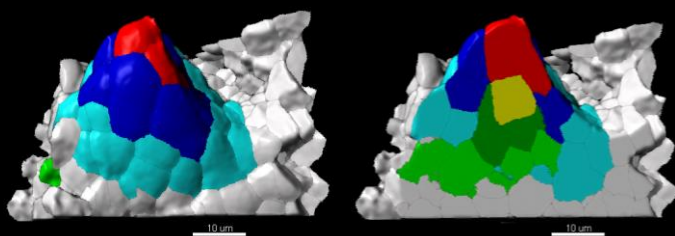

**EM\_C\_571**

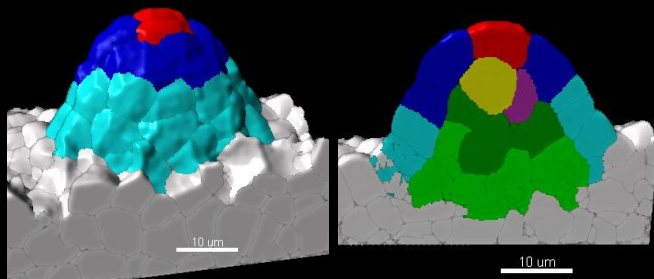

**EM\_C\_744A**

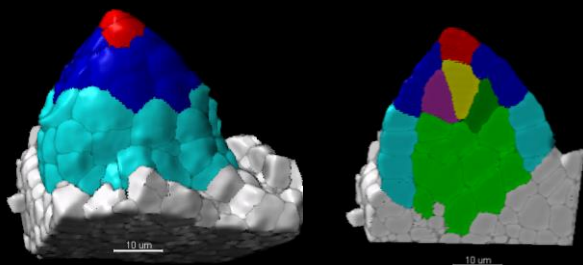

**EM\_C\_574**

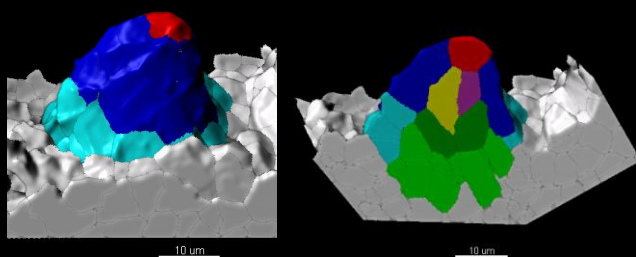

**EM\_C\_745B**

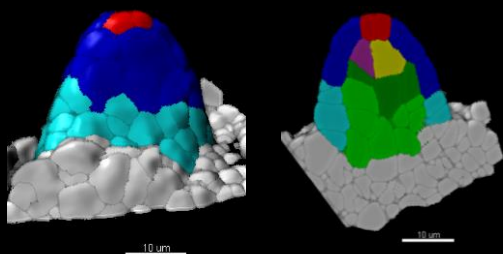

**EM\_C\_753**

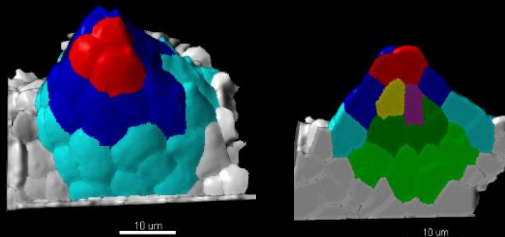

**EM\_C\_572**

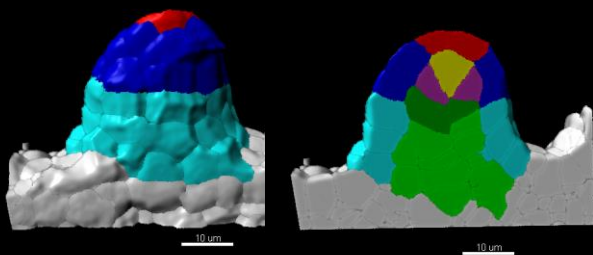

**EM\_C\_754A**

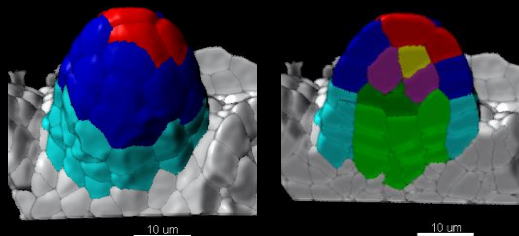

**EM\_C\_573**

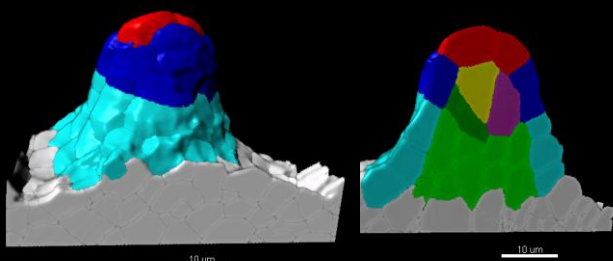

**EM\_C\_754B**

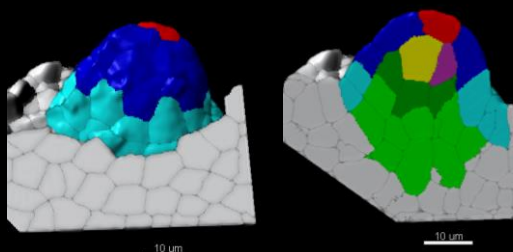

***bot1-7***

Stage 0-III

EM\_C\_280A

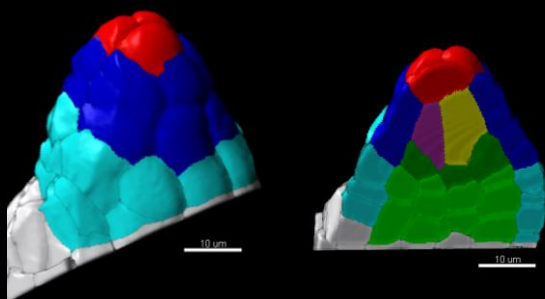

EM\_C\_755B

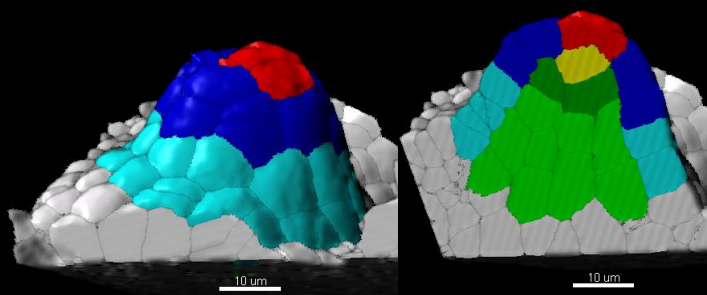

EM\_C\_792B

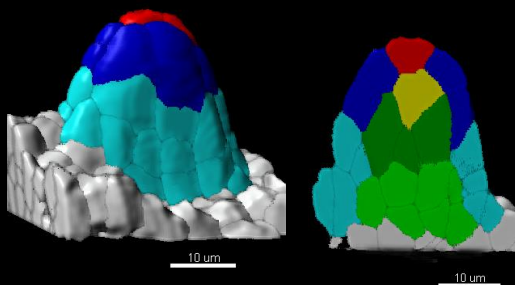

EM\_C\_790

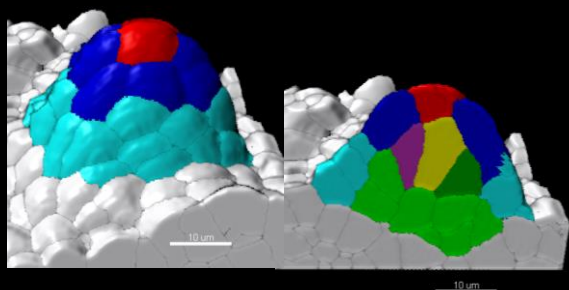

EM\_C\_777

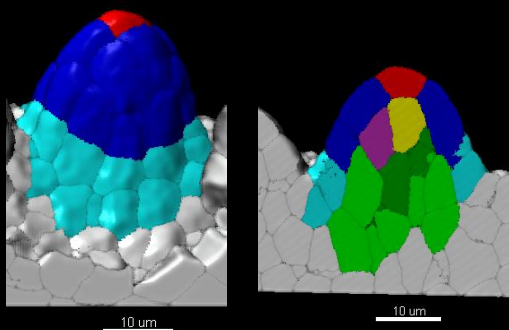

EM\_C\_779

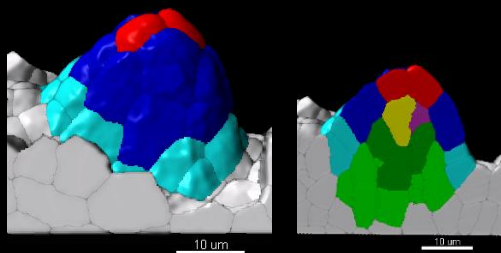

**EM\_C\_743A**

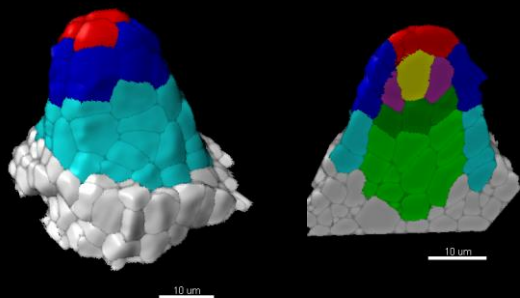

**EM\_C\_913**

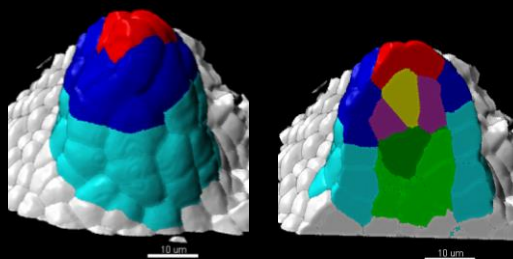

**EM\_C\_757**

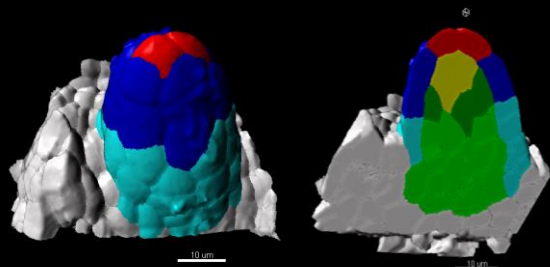

**EM\_C\_783**

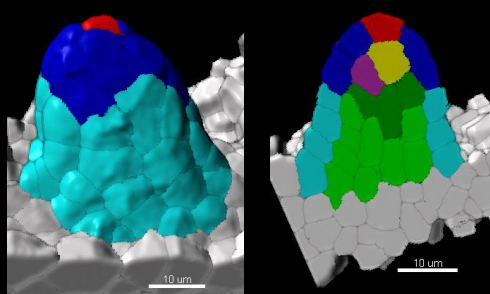

**EM\_C\_752**

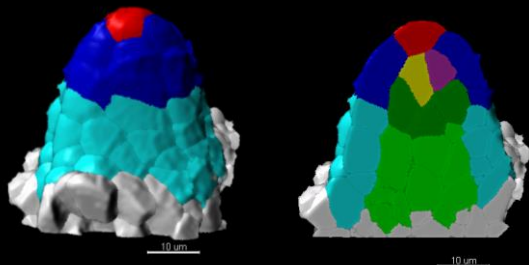

**EM\_C\_782A**

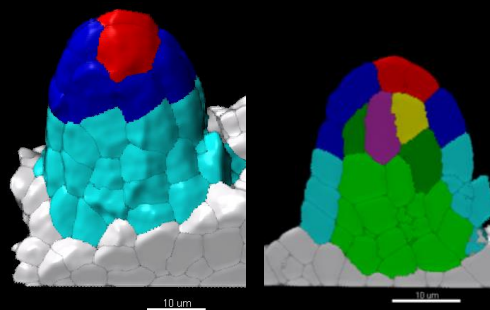

**EM\_C\_590**

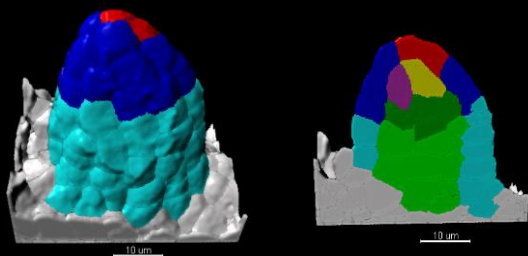

**EM\_C\_778**

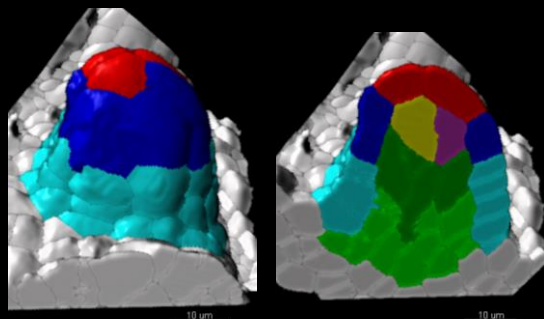

**EM\_C\_921**

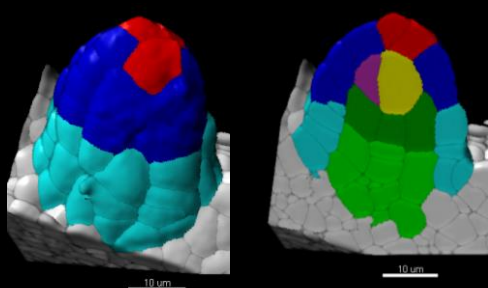

**EM\_C\_914**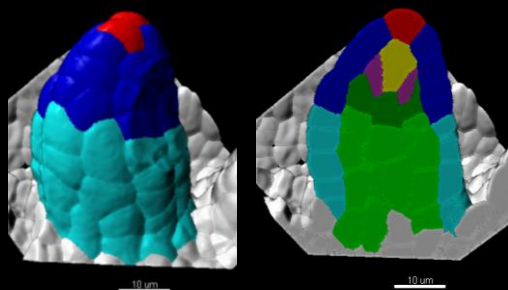**EM\_C\_747**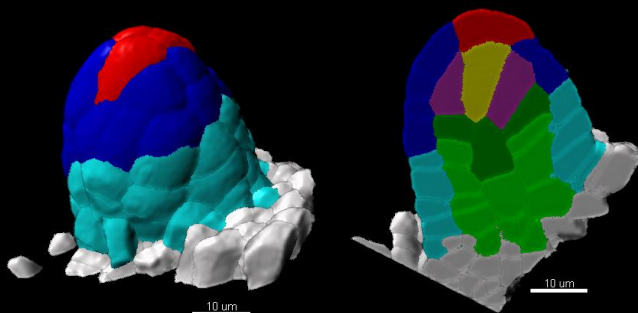**EM\_C\_743B**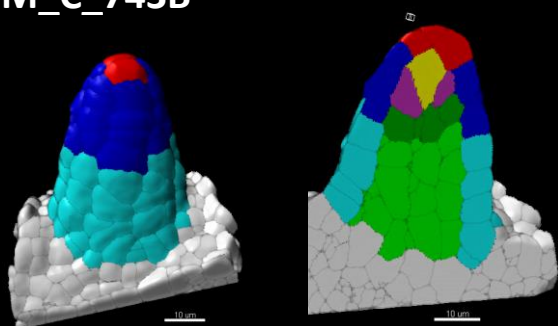**EM\_C\_750**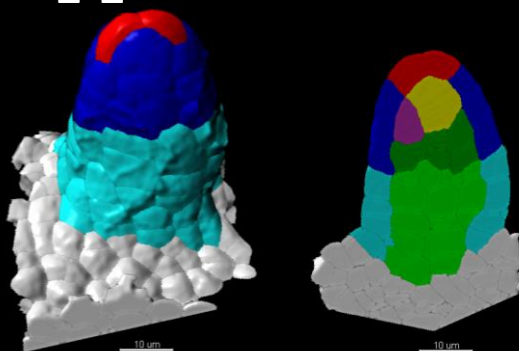**EM\_C\_744B**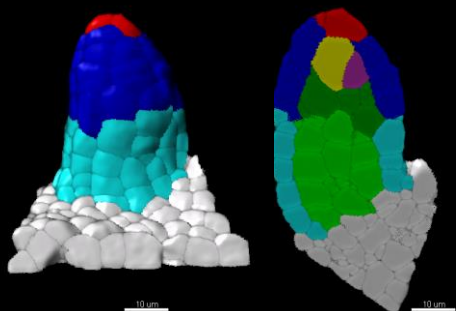**EM\_C\_751**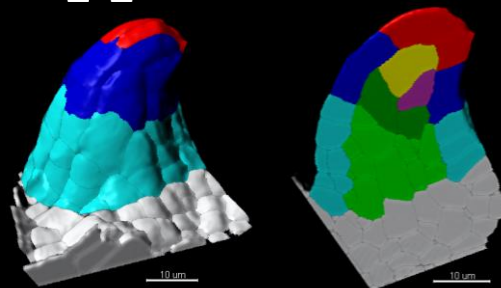**EM\_C\_745A**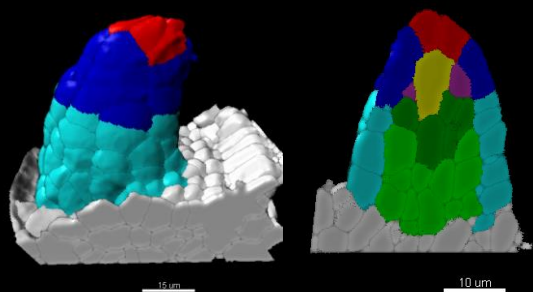**EM\_C\_591**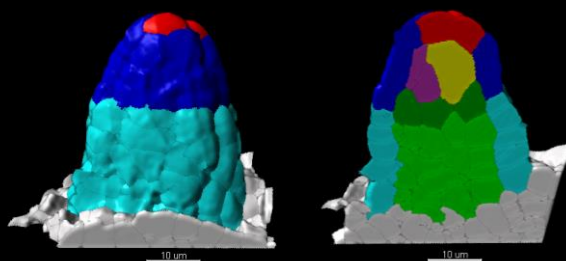

**EM\_C\_755**

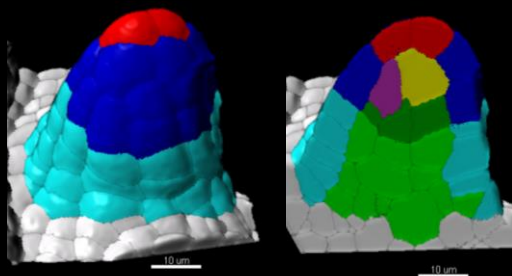

**EM\_C\_768**

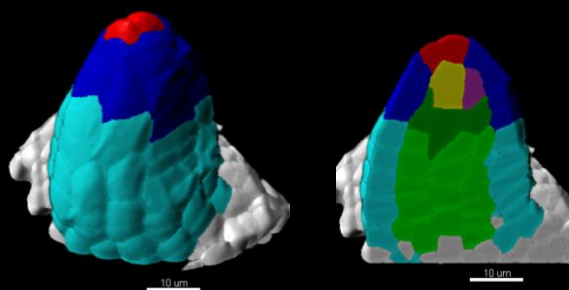

**EM\_C\_281B**

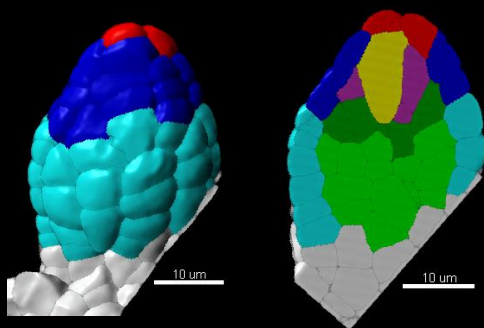

**EM\_C\_282B**

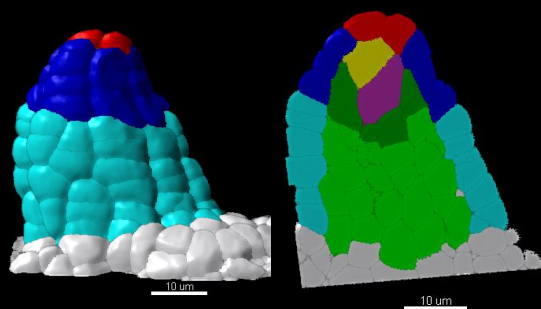

EM\_C\_729B

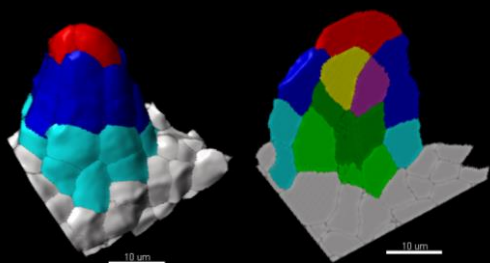

EM\_C\_905A

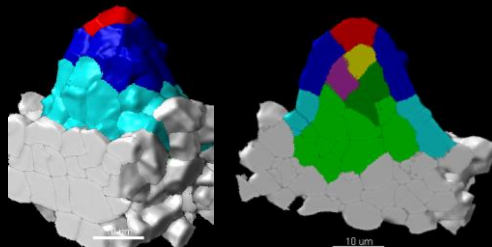

EM\_C\_722

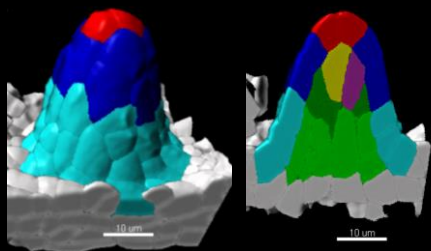

EM\_C\_905B

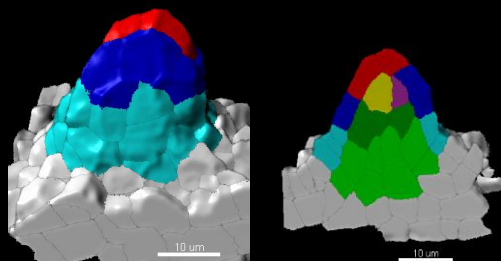

EM\_C\_902B

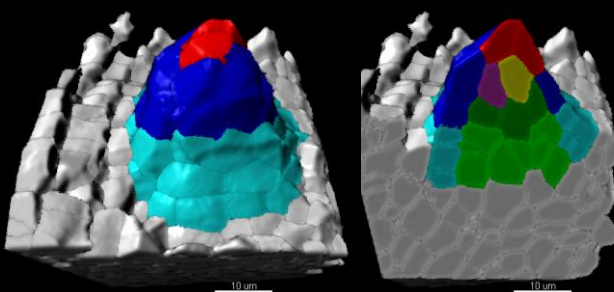

EM\_C\_728B

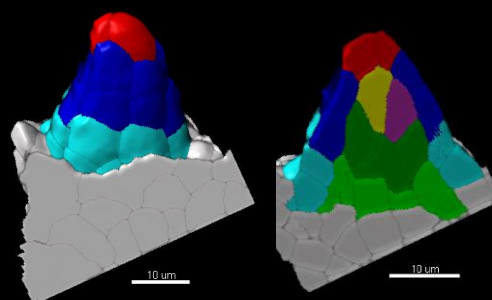

EM\_C\_904

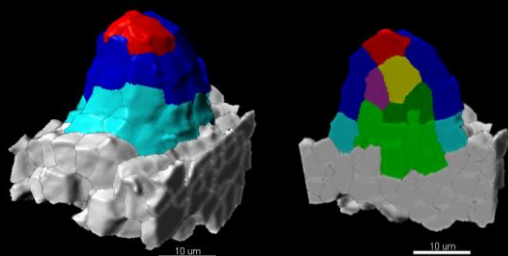

EM\_C\_732

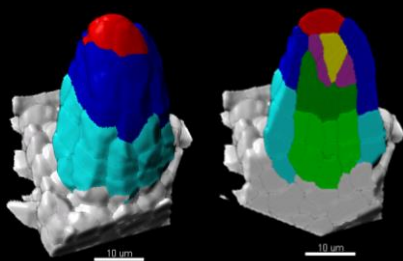

EM\_C\_726

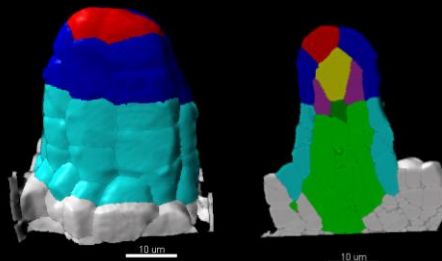

EM\_C\_735A

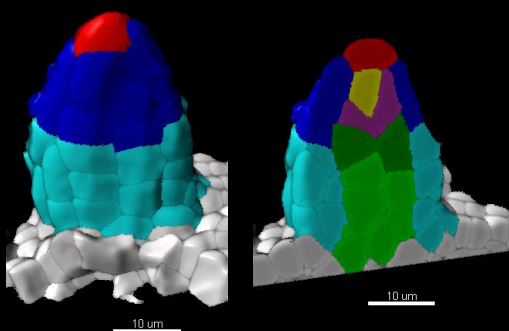

EM\_C\_731A

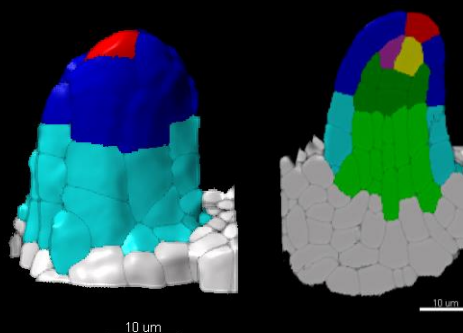

EM\_C\_723

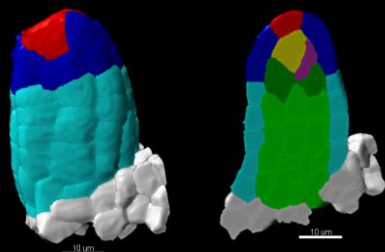

EM\_C\_731B

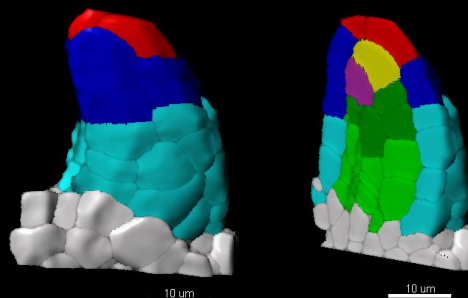

EM\_C\_724

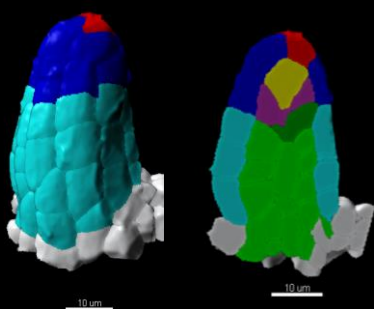

EM\_C\_733

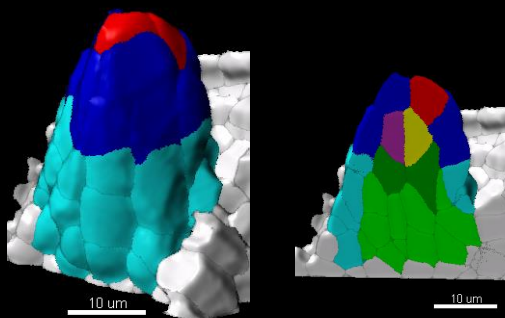

EM\_C\_729A

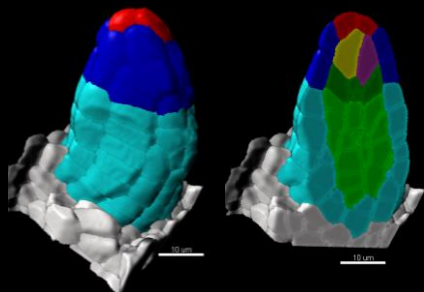

EM\_C\_736

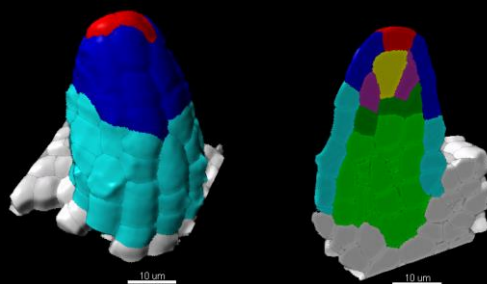

EM\_C\_719

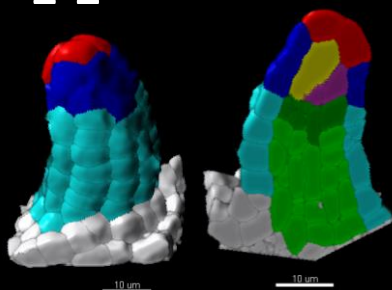

EM\_C\_727

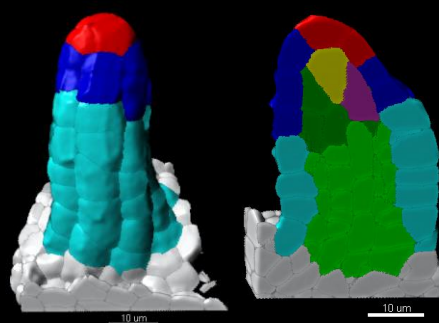

EM\_C\_734

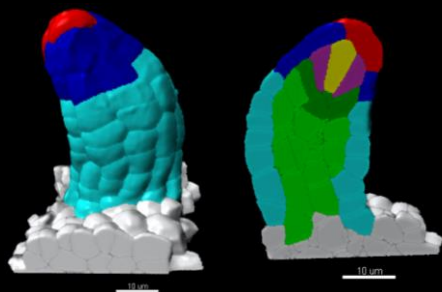

EM\_C\_677

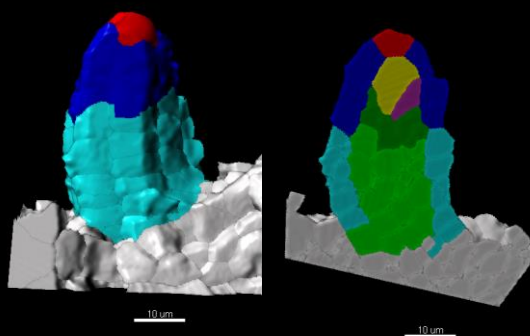

EM\_C\_735B

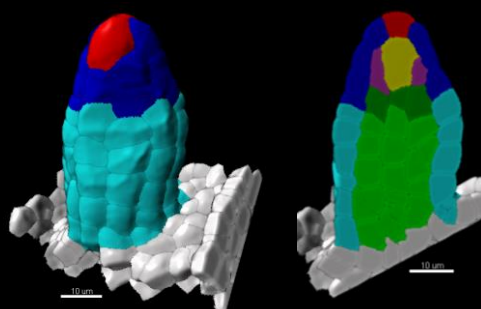

Supplement: supp [file elife-66031-supp-v1.zip › elife_poa_e66031_Figure_4_source_data_1.pdf]
