# Supplementary material for: Organ geometry channels reproductive cell fate in the Arabidopsis ovule primordium
Source: eLife journal article supplement (doi:10.7554/elife.66031), 2021-05-07
Supplement: supp [file elife-66031-supp-v1.zip]

Archive with 18 entries (18 files):
- elife_poa_e66031_Transparent_Reporting_File.docx
- elife_poa_e66031_Figure_1_figure_supplement_1.pdf
- elife_poa_e66031_Figure_2_figure_supplement_1.pdf
- elife_poa_e66031_Figure_2_video_1.mp4
- elife_poa_e66031_Figure_3_figure_supplement_1.pdf
- elife_poa_e66031_Figure_3_video_1.mp4
- elife_poa_e66031_Figure_3_video_2.mp4
- elife_poa_e66031_Figure_4_figure_supplement_1.pdf
- elife_poa_e66031_Figure_4_figure_supplement_2.pdf
- elife_poa_e66031_Figure_5_figure_supplement_1.pdf
- elife_poa_e66031_Figure_5_figure_supplement_2.pdf
- elife_poa_e66031_Figure_6_figure_supplement_1.pdf
- elife_poa_e66031_Figure_1_source_data_1.pdf
- elife_poa_e66031_Figure_2_source_data_1.xlsx
- elife_poa_e66031_Figure_4_source_data_1.pdf
- elife_poa_e66031_Figure_4_source_data_2.xlsx
- elife_poa_e66031_Figure_5_source_data_1.xlsx
- elife_poa_e66031_Figure_6_source_data_1.xlsx
