# Supplementary material for: Organ geometry channels reproductive cell fate in the Arabidopsis ovule primordium
Source: eLife journal article supplement (doi:10.7554/elife.66031), 2021-05-07
Supplement: supp [file elife-66031-supp-v1.zip › elife_poa_e66031_Figure_2_source_data_1.xlsx]

## Sheet: Figure 2A-B; Table 1_raw data
image ID	ovule stage	number of cell layers above placenta	total number of cells	mean cell volume	sd cell volume	ovule width	ovule heigth	ovule heigth:width ratio
EM_C_149	0-I	3	27	129.325	11.2754	20.4	5.27	0.258333
EM_C_237	0-I	3	37	129.096	7.57352	23.2	6	0.258621
EM_C_240	0-I	3	30	102.118	7.27707	24	6.1	0.254167
EM_C_242A	0-I	3	26	107.825	5.55178	17	2.99	0.175882
EM_C_243A	0-I	3	25	118.921	8.22021	19.5	2.72	0.139487
EM_C_243B	0-I	3	36	103.97	5.47147	26.6	5.59	0.21015
EM_C_244A	0-I	3	27	109.128	7.81375	22.72	5.32	0.234155
EM_C_245	0-I	2	31	109.852	6.52124	32.8	6.54	0.19939
EM_C_25	0-I	2	28	122.186	5.99112	23.64	5.8	0.245347
EM_C_354A	0-I	2	30	125.464	5.98672	nd	nd	nd
EM_C_354B	0-I	2	21	139.934	9.77171	nd	nd	nd
EM_C_377	0-I	2	24	137.429	8.12867	nd	nd	nd
EM_C_378	0-I	3	23	133.752	8.3526	nd	nd	nd
EM_C_58	0-I	2	32	80.2365	4.79561	23.76	5.46	0.229798
EM_C_59	0-I	3	33	132.543	6.72246	22.7	4.3	0.189427
EM_C_60	0-I	3	33	124.507	6.06134	nd	nd	nd
EM_C_595	0-I	2	18	129.2	9.30764	nd	nd	nd
EM_C_596	0-I	2	18	115.832	9.03107	nd	nd	nd
EM_C_597	0-I	2	25	116.696	6.45125	nd	nd	nd
EM_C_60	0-I	3	36	122.88	6.91576	22.9	6.3	0.275109
EM_C_76	0-I	2	27	125.849	7.00332	23.4	6.5	0.277778
EM_C_146	0-II	3	43	110.724	6.40015	24.5	11.2	0.457143
EM_C_148	0-II	4	54	142.389	8.24536	30	15	0.5
EM_C_150	0-II	4	54	141.239	7.46868	29.5	15.4	0.522034
EM_C_211	0-II	4	29	140.453	7.44388	26.28	10.9	0.414764
EM_C_212A	0-II	3	37	129.596	8.45101	26.83	11.02	0.410734
EM_C_212B	0-II	4	41	130.098	8.00389	25.29	11.76	0.465006
EM_C_213	0-II	3	38	132.648	8.05635	25.9	14.2	0.548263
EM_C_214	0-II	4	37	121.988	6.88419	28	11.5	0.410714
EM_C_22	0-II	3	42	120.448	9.10244	27.37	11.85	0.432956
EM_C_238	0-II	4	33	142.595	7.76244	25.9	14.2	0.548263
EM_C_239	0-II	3	40	117.336	5.39742	28	11.5	0.410714
EM_C_246	0-II	4	34	117.825	5.11998	nd	nd	nd
EM_C_57	0-II	4	35	129.443	7.96398	23.06	8.7	0.377277
EM_C_61	0-II	3	30	109.118	5.6064	nd	nd	nd
EM_C_75	0-II	3	39	135.5	6.2536	21.1	10.7	0.507109
EM_C_77	0-II	4	40	100.885	6.46342	26.2	8.91	0.340076
EM_C_78	0-II	4	41	123.44	7.54721	nd	nd	nd
EM_C_136	0-III	6	76	138.11	5.14673	30.15	20.79	0.689552
EM_C_138	0-III	6	74	115.146	5.44795	nd	nd	nd
EM_C_139	0-III	5	70	131.98	5.83266	26.38	18.68	0.708112
EM_C_140	0-III	5	81	115.844	5.05938	27.78	20.83	0.74982
EM_C_141	0-III	5	79	125.363	4.84377	28.84	20.7	0.717753
EM_C_142	0-III	5	72	135.444	4.73563	23.95	22.49	0.93904
EM_C_187	0-III	5	69	137.154	4.2437	25.72	20.47	0.795879
EM_C_202	0-III	6	82	154.036	5.31912	34.03	28.43	0.835439
EM_C_399	0-III	8	87	156.649	6.03653	nd	nd	nd
EM_C_403	0-III	7	96	112.643	4.52292	nd	nd	nd
EM_C_6	0-III	7	88	139.318	5.23084	27.39	27.81	1.01533
EM_C_185	1-I	6	103	140.075	4.55762	24.09	28.18	1.16978
EM_C_186	1-I	6	107	125.589	4.32285	nd	nd	nd
EM_C_188	1-I	6	111	117.313	3.22068	25.8	29.81	1.15543
EM_C_189	1-I	7	98	129.718	3.78773	25.43	28.52	1.12151
EM_C_196	1-I	10	100	129.097	4.24836	28.56	27.93	0.977941
EM_C_198	1-I	8	93	138.276	3.86379	28.77	29.44	1.02329
EM_C_200	1-I	7	123	122.106	3.94214	28.7	35.39	1.2331
EM_C_357A	1-I	6	95	127.309	5.11067	nd	nd	nd
EM_C_357B	1-I	6	88	126.214	4.79241	nd	nd	nd
EM_C_359A	1-I	6	97	117.278	3.82029	nd	nd	nd
EM_C_359C	1-I	9	102	144.112	5.45906	nd	nd	nd
EM_C_359D	1-I	9	115	147.812	4.42999	nd	nd	nd
EM_C_400	1-I	8	117	126.203	4.46131	nd	nd	nd
EM_C_404	1-I	8	103	125.106	5.53735	nd	nd	nd
EM_C_406	1-I	7	122	122.903	4.91146	nd	nd	nd
EM_C_102A	1-II	9	165	88.1823	2.96782	nd	nd	nd
EM_C_112	1-II	11	150	104.209	2.7678	34.82	46.05	1.32252
EM_C_160	1-II	11	117	172.298	6.20888	30.16	37.38	1.23939
EM_C_162	1-II	11	130	157.392	6.61459	26.28	49.92	1.89954
EM_C_184	1-II	10	113	127.581	4.14309	26.58	38.5	1.44846
EM_C_199	1-II	8	112	133.206	4.25068	28.26	33.43	1.18294
EM_C_201	1-II	10	123	136.26	3.83501	27.89	37.13	1.3313
EM_C_204	1-II	9	104	127.35	4.42011	23.29	34.8	1.4942
EM_C_359B	1-II	10	120	153.118	4.99885	nd	nd	nd
EM_C_607	1-II	9	128	132.253	3.83534	nd	nd	nd
EM_C_96	1-II	9	140	101.859	3.71687	25.29	34.48	1.36338
EM_C_101	2-I	10	176	91.9508	2.71596
EM_C_102B	2-I	10	153	105.276	3.29386
EM_C_113	2-I	10	138	106.123	3.45371
EM_C_130	2-I	9	152	128.85	4.65776
EM_C_157	2-I	12	129	135.653	5.9291
EM_C_159	2-I	10	122	138.526	5.52452
EM_C_161	2-I	9	136	146.588	5.82639
EM_C_191	2-I	11	172	122.734	4.16576
EM_C_229	2-I	11	170	121.352	3.7253
EM_C_232	2-I	12	159	132.07	4.85112
EM_C_128	2-II	13	171	150.207	6.40107
EM_C_129	2-II	13	166	119.031	6.38363
EM_C_132	2-II	11	143	119.948	4.57965
EM_C_230	2-II	13	156	116.697	3.74996
EM_C_254	2-II	12	142	120.679	5.35567
EM_C_352	2-II	14	202	138.825	5.10201
EM_C_81	2-II	12	170	113.482	5.80138

## Sheet: Figure 2A_Table
Cell volume and cell number per ovule
	Cell volume					Cell Number per ovule
Stage	mean	sd	n(cells)	vs	P value*	mean	sd	n(ovule)	vs	P value*
st0-I	119.082	1.66877	587	-	-	27.9524	1.20213	21	-	-
st0-II	127.078	1.88368	625	0-I	0.1226	39.0625	1.75942	16	st0-I	1.85e-05
st0-III	132.828	1.62941	874	0-I	0.03765	79.4545	2.5383	11	st0-II	0.01557
st1-I	129.167	1.17506	1574	0-III	ns	104.933	2.74724	15	-
st1-II	128.177	1.47557	1402	0-III	ns	127.455	5.44787	11	-
st2-I	121.829	1.44777	1507	0-III	ns	150.7	5.97597	10	-
st2-II	126.324	2.10628	1150	0-III	ns	164.286	7.74816	7	-
(*)= Man Whitney U test

## Sheet: Figure 2C_Table_graphs
stage	width		height		h:w ratio		n
	mean	std	mean	std	mean	std
0-I	23.2785	3.45335	5.29923	1.24033	0.226742	0.04157	13
0-II	26.2807	2.37388	11.9171	2.06923	0.453218	0.0644056	14
0-III	28.03	3.07821	22.525	3.606	0.806366	0.117458	8
1-I	26.8917	2.0376	29.8783	2.79645	1.11351	0.0957165	6
1-II	27.8212	3.495	38.9613	5.90887	1.41022	0.221973	8

## Sheet: Figure 2D_Table graphs
	Fold-change in
Transition	Cell Number	Cell Volume	Aspect Ratio
st0-I>st0-II	1.39747	1.06714	1.99883
st0-II>st0-III	2.03404	1.04525	1.7792
st0-III>st1-I	1.32067	0.97244	1.3809
st1-I>st1-II	1.21462	0.992335	1.26646
st1-II>st2-I	1.18238	0.950471	-
st2-I>st2-II	1.09015	1.0369	-
	Fold-change in
Transition	Cell Number	Cell Volume	Aspect Ratio
st0-I>st0-III	2.8425	1.11543	3.55632
st0-III>st2-I	1.89668	0.917191	1.74886
st2-I>st2-II	1.09015	1.0369

## Sheet: Figure 2H_table raw data
Quantification of CYCB1.1::db-GFP positive cells at distinct ovule primorium domains during development (Col background)
	Summary_table:
		Stage 0-II			Stage 0-III			Stage 1-I			Stage 1-II			Stage 2-I			Stage 2-II
	Ovule domains	Mitoses	%	SE	Mitoses	%	SE	Mitoses	%	SE	Mitoses	%	SE	Mitoses	%	SE	Mitoses	%	SE
	L1 dome	127	55.2174	4.76566	35	24.3056	5.39079	30	23.4375	2.31255	19	24.0506	4.17601	9	9.09091	0.605564	4	7.01754	1.99731
	L1 apical	20	8.69565	2.14963	15	10.4167	4.7035	14	10.9375	2.63803	7	8.86076	1.76679	8	8.08081	4.25778	6	10.5263	3.43915
	L1 basal	43	18.6957	3.19977	49	34.0278	2.91598	26	20.3125	5.4271	19	24.0506	4.681	51	51.5152	3.43153	20	35.0877	7.3505
	cSMC	5	2.17391	1.00087	5	3.47222	1.36523	5	3.90625	1.8945	2	2.53165	2.27273	0	0	0	0	0	0
	Neighbors	2	0.869565	0.912476	14	9.72222	2.64843	4	3.125	1.23625	15	18.9873	4.70683	4	4.0404	0.943183	3	5.26316	0.26455
	L2 ,L3 basal	33	14.3478	2.68084	26	18.0556	4.41147	49	38.2812	4.63756	17	21.519	2.46298	27	27.2727	3.68509	24	42.1053	3.84281
	Total mitoses:	230			144			128			79			99			57
	Total ovules:	197			102			88			36			28			30
	Total Plants:	17			8			5			4			3			3
	Raw_Data:
		GFP positive cells											GFP positive cells											GFP positive cells											GFP positive cells											GFP positive cells
		STAGE 0-II	Ovules	L1 dome	L1 apical	L1 basal	cSMC	Neighbors	L2,L3 basal	Mitoses			STAGE 0-III	Ovules	L1 dome	L1 apical	L1 basal	cSMC	Neighbors	L2,L3 basal	Mitoses			STAGE 1-I	Ovules	L1 dome	L1 apical	L1 basal	cSMC	Neighbors	L2,L3 basal	Mitoses			STAGE 1-II	Ovules	L1 dome	L1 apical	L1 basal	cSMC	Neighbors	L2,L3 basal	Mitoses			STAGE 2-I	Ovules	L1 dome	L1 apical
		Plant 1	10	9	0	1	0	0	0	10			Plant 1	21	17	0	11	3	6	7	44			Plant 1	13	8	2	9	2	1	7	29			Plant 1	7	4	1	8	2	2	5	22			Plant 1	10	3	3
		Plant 2	7	4	0	2	0	0	1	7			Plant 2	8	2	0	5	1	0	3	11			Plant 2	20	6	2	10	1	2	12	33			Plant 2	10	8	3	5	0	4	4	24			Plant 2	9	3	0
		Plant 3	8	8	0	4	0	0	1	13			Plant 3	11	6	0	6	1	0	4	17			Plant 3	19	6	5	2	0	0	12	25			Plant 3	9	3	2	4	0	6	4	19			Plant 3	9	3	5
		Plant 4	14	10	4	0	0	0	0	14			Plant 4	12	0	3	5	0	0	5	13			Plant 4	19	4	2	4	2	1	8	21			Plant 4	10	4	1	2	0	3	4	14				28	9	8
		Plant 5	10	8	1	0	0	0	1	10			Plant 5	14	0	4	4	0	2	1	11			Plant 5	17	6	3	1	0	0	10	20				36	19	7	19	2	15	17	79
		Plant 6	15	9	3	0	0	0	3	15			Plant 6	12	1	2	5	0	2	4	14				88	30	14	26	5	4	49	128
		Plant 7	16	10	2	7	0	0	1	20			Plant 7	11	4	2	8	0	2	0	16
		Plant 8	20	9	4	8	0	0	1	22			Plant 8	13	5	4	5	0	2	2	18
		Plant 9	6	5	0	2	1	1	1	10				102	35	15	49	5	14	26	144
		Plant 10	6	6	0	0	0	1	1	8
		Plant 11	11	10	0	3	0	0	1	14
		Plant 12	12	8	0	3	0	0	1	12
		Plant 13	9	6	0	0	0	0	2	8
		Plant 14	11	6	2	2	0	0	4	14
		Plant 15	14	8	1	4	0	0	2	15
		Plant 16	15	8	1	3	3	0	7	22
		Plant 17	13	3	2	4	1	0	6	16
			197	127	20	43	5	2	33	230
		Percentage											Percentage											Percentage											Percentage											Percentage
		STAGE 0-II	Ovules	L1 dome	L1 apical	L1 basal	cSMC	L2 lateral to SMC	L2,L3 basal	Mitoses			STAGE 0-III	Ovules	L1 dome	L1 apical	L1 basal	cSMC	L2 lateral to SMC	L2,L3 basal	Mitoses			STAGE 1-I	Ovules	L1 dome	L1 apical	L1 basal	cSMC	L2 lateral to SMC	L2,L3 basal	Mitoses			STAGE 1-II	Ovules	L1 dome	L1 apical	L1 basal	cSMC	L2 lateral to SMC	L2,L3 basal	Mitoses			STAGE 2-I	Ovules	L1 dome	L1 apical
		Plant 1	10	90	0	10	0	0	0				Plant 1	21	38.6364	0	25	6.81818	13.6364	15.9091				Plant 1	13	27.5862	6.89655	31.0345	6.89655	3.44828	24.1379				Plant 1	7	18.1818	4.54545	36.3636	9.09091	9.09091	22.7273				Plant 1	10	8.33333	8.33333
		Plant 2	7	57.1429	0	28.5714	0	0	14.2857				Plant 2	8	18.1818	0	45.4545	9.09091	0	27.2727				Plant 2	20	18.1818	6.06061	30.303	3.0303	6.06061	36.3636				Plant 2	10	33.3333	12.5	20.8333	0	16.6667	16.6667				Plant 2	9	10.3448	0
		Plant 3	8	61.5385	0	30.7692	0	0	7.69231				Plant 3	11	35.2941	0	35.2941	5.88235	0	23.5294				Plant 3	19	24	20	8	0	0	48				Plant 3	9	15.7895	10.5263	21.0526	0	31.5789	21.0526				Plant 3	9	8.82353	14.7059
		Plant 4	14	71.4286	28.5714	0	0	0	0				Plant 4	12	0	23.0769	38.4615	0	0	38.4615				Plant 4	19	19.0476	9.52381	19.0476	9.52381	4.7619	38.0952				Plant 4	10	28.5714	7.14286	14.2857	0	21.4286	28.5714					28	9.09091	8.08081
		Plant 5	10	80	10	0	0	0	10				Plant 5	14	0	36.3636	36.3636	0	18.1818	9.09091				Plant 5	17	30	15	5	0	0	50					36	24.0506	8.86076	24.0506	2.53165	18.9873	21.519	100				SD	1.04887	7.3747
		Plant 6	15	60	20	0	0	0	20				Plant 6	12	7.14286	14.2857	35.7143	0	14.2857	28.5714					88	23.4375	10.9375	20.3125	3.90625	3.125	38.2812	100				SD	8.35203	3.53358	9.36199	4.54545	9.41366	4.92597					SE	0.605564	4.25778
		Plant 7	16	50	10	35	0	0	5				Plant 7	11	25	12.5	50	0	12.5	0					SD	5.17102	5.89881	12.1354	4.23623	2.76434	10.3699					SE	4.17601	1.76679	4.681	2.27273	4.70683	2.46298
		Plant 8	20	40.9091	18.1818	36.3636	0	0	4.54545				Plant 8	13	27.7778	22.2222	27.7778	0	11.1111	11.1111					SE	2.31255	2.63803	5.4271	1.8945	1.23625	4.63756
		Plant 9	6	50	0	20	10	10	10					102	24.3056	10.4167	34.0278	3.47222	9.72222	18.0556	100
		Plant 10	6	75	0	0	0	12.5	12.5					SD	15.2475	13.3035	8.24764	3.86146	7.4909	12.4775
		Plant 11	11	71.4286	0	21.4286	0	0	7.14286					SE	5.39079	4.7035	2.91598	1.36523	2.64843	4.41147
		Plant 12	12	66.6667	0	25	0	0	8.33333
		Plant 13	9	75	0	0	0	0	25
		Plant 14	11	42.8571	14.2857	14.2857	0	0	28.5714
		Plant 15	14	53.3333	6.66667	26.6667	0	0	13.3333
		Plant 16	15	36.3636	4.54545	13.6364	13.6364	0	31.8182
		Plant 17	13	8	12.5	25	6.25	0	37.5
			197	55.2174	8.69565	18.6957	2.17391	0.869565	14.3478	100
			SD	19.6493	8.86313	13.193	4.12668	3.76223	11.0534
			SE	4.76566	2.14963	3.19977	1.00087	0.912476	2.68084
[truncated: 14 more columns]

## Sheet: Figure 2I_raw data
Stage	Viewpoints	Stack	mean volume	sd	n		INSET	Stage	Viewpoints	Stack	mean volume	sd	n
st0-I	other L2	EM_C_149	145.8	20.4136	12			st0-I	rest	EM_C_149	126.022	11.2036	26
st0-I	other L2	EM_C_237	143.169	15.4086	14			st0-I	rest	EM_C_237	125.913	7.06562	36
st0-I	other L2	EM_C_240	141.088	12.7592	9			st0-I	rest	EM_C_240	101.309	7.48576	29
st0-I	other L2	EM_C_241	112.945	8.74113	10			st0-I	rest	EM_C_241	106.831	5.68509	25
st0-I	other L2	EM_C_242A	149.653	14.0995	9			st0-I	rest	EM_C_242A	121.373	8.18	24
st0-I	other L2	EM_C_243A	128.379	8.50328	14			st0-I	rest	EM_C_243A	102.975	5.53624	35
st0-I	other L2	EM_C_243B	130.982	12.4215	11			st0-I	rest	EM_C_243B	106.494	7.64517	26
st0-I	other L2	EM_C_244A	133.95	15.7901	10			st0-I	rest	EM_C_244A	110.068	6.73867	30
st0-I	other L2	EM_C_245	142.586	8.73023	9			st0-I	rest	EM_C_245	119.514	5.56486	27
st0-I	other L2	EM_C_25	135.15	8.93083	13			st0-I	rest	EM_C_25	123.598	5.8882	29
st0-I	other L2	EM_C_354A	147.303	14.9228	7			st0-I	rest	EM_C_354A	138.704	10.1913	20
st0-I	other L2	EM_C_354B	145.203	14.1477	11			st0-I	rest	EM_C_354B	135.546	8.259	23
st0-I	other L2	EM_C_377	155.254	15.3125	9			st0-I	rest	EM_C_377	131.147	8.30524	22
st0-I	other L2	EM_C_378	75.1998	8.31495	11			st0-I	rest	EM_C_378	77.7653	4.24467	31
st0-I	other L2	EM_C_58	150.281	12.2674	13			st0-I	rest	EM_C_58	131.743	6.88663	32
st0-I	other L2	EM_C_59	138.222	10.2802	15			st0-I	rest	EM_C_59	124.326	6.25105	32
st0-I	other L2	EM_C_595	128.586	14.1982	6			st0-I	rest	EM_C_595	124.46	8.49636	17
st0-I	other L2	EM_C_596	139.643	22.9129	5			st0-I	rest	EM_C_596	114.876	9.52509	17
st0-I	other L2	EM_C_597	113.419	11.7127	8			st0-I	rest	EM_C_597	113.972	6.09658	24
st0-I	other L2	EM_C_60	156.354	13.469	12			st0-I	rest	EM_C_60	122.789	7.11564	35
st0-I	other L2	EM_C_76	141.2	11.7921	11			st0-I	rest	EM_C_76	123.809	6.9626	26
st0-I	SMC	EM_C_149	215.212	NA	1			st0-I	SMC	EM_C_149	215.212	NA	1
st0-I	SMC	EM_C_237	243.697	NA	1			st0-I	SMC	EM_C_237	243.697	NA	1
st0-I	SMC	EM_C_240	125.586	NA	1			st0-I	SMC	EM_C_240	125.586	NA	1
st0-I	SMC	EM_C_241	132.678	NA	1			st0-I	SMC	EM_C_241	132.678	NA	1
st0-I	SMC	EM_C_242A	60.0722	NA	1			st0-I	SMC	EM_C_242A	60.0722	NA	1
st0-I	SMC	EM_C_243A	138.791	NA	1			st0-I	SMC	EM_C_243A	138.791	NA	1
st0-I	SMC	EM_C_243B	177.6	NA	1			st0-I	SMC	EM_C_243B	177.6	NA	1
st0-I	SMC	EM_C_244A	103.379	NA	1			st0-I	SMC	EM_C_244A	103.379	NA	1
st0-I	SMC	EM_C_245	194.321	NA	1			st0-I	SMC	EM_C_245	194.321	NA	1
st0-I	SMC	EM_C_25	179.573	NA	1			st0-I	SMC	EM_C_25	179.573	NA	1
st0-I	SMC	EM_C_354A	164.552	NA	1			st0-I	SMC	EM_C_354A	164.552	NA	1
st0-I	SMC	EM_C_354B	180.755	NA	1			st0-I	SMC	EM_C_354B	180.755	NA	1
st0-I	SMC	EM_C_377	191.066	NA	1			st0-I	SMC	EM_C_377	191.066	NA	1
st0-I	SMC	EM_C_378	156.843	NA	1			st0-I	SMC	EM_C_378	156.843	NA	1
st0-I	SMC	EM_C_58	158.144	NA	1			st0-I	SMC	EM_C_58	158.144	NA	1
st0-I	SMC	EM_C_59	130.27	NA	1			st0-I	SMC	EM_C_59	130.27	NA	1
st0-I	SMC	EM_C_595	209.775	NA	1			st0-I	SMC	EM_C_595	209.775	NA	1
st0-I	SMC	EM_C_596	132.081	NA	1			st0-I	SMC	EM_C_596	132.081	NA	1
st0-I	SMC	EM_C_597	182.088	NA	1			st0-I	SMC	EM_C_597	182.088	NA	1
st0-I	SMC	EM_C_60	126.055	NA	1			st0-I	SMC	EM_C_60	126.055	NA	1
st0-I	SMC	EM_C_76	178.877	NA	1			st0-I	SMC	EM_C_76	178.877	NA	1
st0-II	other L2	EM_C_146	137.916	12.4702	16			st0-II	rest	EM_C_146	110.117	6.52489	42
st0-II	other L2	EM_C_148	171.74	15.5157	22			st0-II	rest	EM_C_148	141.792	8.38042	53
st0-II	other L2	EM_C_150	160.632	13.3594	23			st0-II	rest	EM_C_150	139.098	7.29135	53
st0-II	other L2	EM_C_211	156.089	12.921	11			st0-II	rest	EM_C_211	137.292	6.98471	28
st0-II	other L2	EM_C_212A	133.39	16.7469	16			st0-II	rest	EM_C_212A	128.899	8.65951	36
st0-II	other L2	EM_C_212B	164.026	12.4034	15			st0-II	rest	EM_C_212B	126.902	7.52408	40
st0-II	other L2	EM_C_213	158.671	16.9277	14			st0-II	rest	EM_C_213	131.8	8.23106	37
st0-II	other L2	EM_C_214	159.555	14.2186	11			st0-II	rest	EM_C_214	121.068	7.01463	36
st0-II	other L2	EM_C_22	150.135	12.2101	14			st0-II	rest	EM_C_22	119.193	9.23814	41
st0-II	other L2	EM_C_238	164.508	20.7461	9			st0-II	rest	EM_C_238	143.189	7.98546	32
st0-II	other L2	EM_C_239	134.963	9.03641	14			st0-II	rest	EM_C_239	117.535	5.53388	39
st0-II	other L2	EM_C_246	135.508	7.55125	10			st0-II	rest	EM_C_246	116.254	5.02281	33
st0-II	other L2	EM_C_57	163.454	22.443	8			st0-II	rest	EM_C_57	126.573	7.65051	34
st0-II	other L2	EM_C_61	126.19	11.8443	9			st0-II	rest	EM_C_61	109.125	5.80317	29
st0-II	other L2	EM_C_75	158.623	10.853	16			st0-II	rest	EM_C_75	135.001	6.3999	38
st0-II	other L2	EM_C_77	107.297	13.3404	13			st0-II	rest	EM_C_77	98.9308	6.3208	39
st0-II	other L2	EM_C_78	150.616	14.0086	17			st0-II	rest	EM_C_78	123.349	7.73774	40
st0-II	SMC	EM_C_146	136.201	NA	1			st0-II	SMC	EM_C_146	136.201	NA	1
st0-II	SMC	EM_C_148	173.997	NA	1			st0-II	SMC	EM_C_148	173.997	NA	1
st0-II	SMC	EM_C_150	254.743	NA	1			st0-II	SMC	EM_C_150	254.743	NA	1
st0-II	SMC	EM_C_211	228.951	NA	1			st0-II	SMC	EM_C_211	228.951	NA	1
st0-II	SMC	EM_C_212A	154.689	NA	1			st0-II	SMC	EM_C_212A	154.689	NA	1
st0-II	SMC	EM_C_212B	257.923	NA	1			st0-II	SMC	EM_C_212B	257.923	NA	1
st0-II	SMC	EM_C_213	164.05	NA	1			st0-II	SMC	EM_C_213	164.05	NA	1
st0-II	SMC	EM_C_214	155.116	NA	1			st0-II	SMC	EM_C_214	155.116	NA	1
st0-II	SMC	EM_C_22	171.905	NA	1			st0-II	SMC	EM_C_22	171.905	NA	1
st0-II	SMC	EM_C_238	123.596	NA	1			st0-II	SMC	EM_C_238	123.596	NA	1
st0-II	SMC	EM_C_239	109.591	NA	1			st0-II	SMC	EM_C_239	109.591	NA	1
st0-II	SMC	EM_C_246	169.685	NA	1			st0-II	SMC	EM_C_246	169.685	NA	1
st0-II	SMC	EM_C_57	227.037	NA	1			st0-II	SMC	EM_C_57	227.037	NA	1
st0-II	SMC	EM_C_61	108.888	NA	1			st0-II	SMC	EM_C_61	108.888	NA	1
st0-II	SMC	EM_C_75	154.473	NA	1			st0-II	SMC	EM_C_75	154.473	NA	1
st0-II	SMC	EM_C_77	177.119	NA	1			st0-II	SMC	EM_C_77	177.119	NA	1
st0-II	SMC	EM_C_78	127.076	NA	1			st0-II	SMC	EM_C_78	127.076	NA	1
st0-III	other L2	EM_C_136	155.12	8.65602	31			st0-III	rest	EM_C_136	137.966	5.21379	75
st0-III	other L2	EM_C_138	106.388	10.5726	31			st0-III	rest	EM_C_138	114.029	5.40574	73
st0-III	other L2	EM_C_139	146.764	10.8573	29			st0-III	rest	EM_C_139	130.727	5.77956	69
st0-III	other L2	EM_C_140	117.8	7.98602	37			st0-III	rest	EM_C_140	113.806	4.68884	80
st0-III	other L2	EM_C_141	125.09	7.50945	35			st0-III	rest	EM_C_141	123.736	4.62124	78
st0-III	other L2	EM_C_142	135.802	6.61621	31			st0-III	rest	EM_C_142	134.032	4.58417	71
st0-III	other L2	EM_C_187	151.027	6.47014	26			st0-III	rest	EM_C_187	136.557	4.26368	68
st0-III	other L2	EM_C_202	161.095	8.70411	29			st0-III	rest	EM_C_202	151.903	4.93346	81
st0-III	other L2	EM_C_399	154.075	10.9283	35			st0-III	rest	EM_C_399	156.092	6.08111	86
st0-III	other L2	EM_C_403	106.98	7.45556	43			st0-III	rest	EM_C_403	112.194	4.54821	95
st0-III	other L2	EM_C_6	139.037	10.2066	35			st0-III	rest	EM_C_6	138.328	5.1955	87
st0-III	SMC	EM_C_136	148.876	NA	1			st0-III	SMC	EM_C_136	148.876	NA	1
st0-III	SMC	EM_C_138	196.693	NA	1			st0-III	SMC	EM_C_138	196.693	NA	1
st0-III	SMC	EM_C_139	218.465	NA	1			st0-III	SMC	EM_C_139	218.465	NA	1
st0-III	SMC	EM_C_140	278.914	NA	1			st0-III	SMC	EM_C_140	278.914	NA	1
st0-III	SMC	EM_C_141	252.262	NA	1			st0-III	SMC	EM_C_141	252.262	NA	1
st0-III	SMC	EM_C_142	235.736	NA	1			st0-III	SMC	EM_C_142	235.736	NA	1
st0-III	SMC	EM_C_187	177.78	NA	1			st0-III	SMC	EM_C_187	177.78	NA	1
st0-III	SMC	EM_C_202	326.77	NA	1			st0-III	SMC	EM_C_202	326.77	NA	1
st0-III	SMC	EM_C_399	204.534	NA	1			st0-III	SMC	EM_C_399	204.534	NA	1
st0-III	SMC	EM_C_403	155.29	NA	1			st0-III	SMC	EM_C_403	155.29	NA	1
st0-III	SMC	EM_C_6	225.528	NA	1			st0-III	SMC	EM_C_6	225.528	NA	1
st1-I	other L2	EM_C_185	139.804	7.9201	38
st1-I	other L2	EM_C_186	130.516	6.22285	38
st1-I	other L2	EM_C_188	121.075	5.39974	49
st1-I	other L2	EM_C_189	148.761	6.74303	39
st1-I	other L2	EM_C_196	140.876	8.04968	41
st1-I	other L2	EM_C_198	151.575	6.15078	37
st1-I	other L2	EM_C_200	119.806	6.41298	47
st1-I	other L2	EM_C_357A	116.631	8.23218	46
st1-I	other L2	EM_C_357B	115.192	8.02123	41
st1-I	other L2	EM_C_359A	107.469	6.30626	42
st1-I	other L2	EM_C_359C	146.359	9.23594	46
st1-I	other L2	EM_C_359D	158.163	7.79147	47
st1-I	other L2	EM_C_400	127.574	8.38505	46
st1-I	other L2	EM_C_404	140.245	10.3018	42
st1-I	other L2	EM_C_406	115.014	8.0731	56
st1-I	SMC	EM_C_185	155.721	NA	1
st1-I	SMC	EM_C_186	433.454	NA	1
st1-I	SMC	EM_C_188	156.551	NA	1
st1-I	SMC	EM_C_189	120.743	NA	1
st1-I	SMC	EM_C_196	189.585	NA	1
st1-I	SMC	EM_C_198	187.749	NA	1
st1-I	SMC	EM_C_200	376.403	NA	1
st1-I	SMC	EM_C_357A	264.757	NA	1
st1-I	SMC	EM_C_357B	248.402	NA	1
st1-I	SMC	EM_C_359A	218.453	NA	1
st1-I	SMC	EM_C_359C	179.561	NA	1
st1-I	SMC	EM_C_359D	215.473	NA	1
st1-I	SMC	EM_C_400	244.296	NA	1
st1-I	SMC	EM_C_404	156.224	NA	1
st1-I	SMC	EM_C_406	130.97	NA	1
st1-II	other L2	EM_C_102A	88.831	4.46495	59
st1-II	other L2	EM_C_112	115.969	6.46608	50
st1-II	other L2	EM_C_160	192.591	11.2018	43
st1-II	other L2	EM_C_162	168.906	10.9399	52
st1-II	other L2	EM_C_184	136.249	8.66921	34
st1-II	other L2	EM_C_199	148.758	6.73551	39
st1-II	other L2	EM_C_201	148.501	7.02362	44
st1-II	other L2	EM_C_204	129.934	5.75999	35
st1-II	other L2	EM_C_359B	141.022	7.75845	56
st1-II	other L2	EM_C_607	137.873	6.18405	48
st1-II	other L2	EM_C_96	87.5045	5.45147	64
st1-II	SMC	EM_C_102A	238.445	NA	1
st1-II	SMC	EM_C_112	145.176	NA	1
st1-II	SMC	EM_C_160	255.803	NA	1
st1-II	SMC	EM_C_162	229.615	NA	1
st1-II	SMC	EM_C_184	308.47	NA	1
st1-II	SMC	EM_C_199	247.364	NA	1
st1-II	SMC	EM_C_201	247.812	NA	1
st1-II	SMC	EM_C_204	448.058	NA	1
st1-II	SMC	EM_C_359B	302.083	NA	1
st1-II	SMC	EM_C_607	340.698	NA	1
st1-II	SMC	EM_C_96	314.969	NA	1
st2-I	other L2	EM_C_101	89.1662	4.42239	78
st2-I	other L2	EM_C_102B	115.934	5.52906	55
st2-I	other L2	EM_C_113	106.643	6.37039	53
st2-I	other L2	EM_C_130	132.579	6.40785	53
st2-I	other L2	EM_C_157	127.153	7.32116	54
st2-I	other L2	EM_C_159	119.264	7.59552	47
st2-I	other L2	EM_C_161	161.599	10.8623	54
st2-I	other L2	EM_C_191	124.003	6.15997	73
st2-I	other L2	EM_C_229	109.765	5.65599	67
st2-I	other L2	EM_C_232	138.771	6.43514	52
st2-I	SMC	EM_C_101	191.985	NA	1
st2-I	SMC	EM_C_102B	249.819	NA	1
st2-I	SMC	EM_C_113	229.306	NA	1
st2-I	SMC	EM_C_130	569.272	NA	1
st2-I	SMC	EM_C_157	569.857	NA	1
st2-I	SMC	EM_C_159	498.379	NA	1
st2-I	SMC	EM_C_161	360.435	NA	1
st2-I	SMC	EM_C_191	248.029	NA	1
st2-I	SMC	EM_C_229	370.762	NA	1
st2-I	SMC	EM_C_232	687.573	NA	1
st2-II	other L2	EM_C_128	156.17	9.16271	51
st2-II	other L2	EM_C_129	103.954	6.35845	48
st2-II	other L2	EM_C_132	116.191	4.67858	51
st2-II	other L2	EM_C_230	106.181	5.02516	61
st2-II	other L2	EM_C_254	114.656	8.9715	48
st2-II	other L2	EM_C_352	129.17	6.8247	69
st2-II	other L2	EM_C_81	108.732	7.76343	54
st2-II	SMC	EM_C_128	990.341	NA	1
st2-II	SMC	EM_C_129	1027.28	NA	1
st2-II	SMC	EM_C_132	594.721	NA	1
st2-II	SMC	EM_C_230	471.303	NA	1
st2-II	SMC	EM_C_254	601.253	NA	1
st2-II	SMC	EM_C_352	885.696	NA	1
st2-II	SMC	EM_C_81	819.494	NA	1

## Sheet: Figure 2I_Table 
Stage	Cell Label	Mean volume	sd	n(cells)	P value*		INSET	Stage	Cell Label	Mean volume	sd	n(cells)	P value*
st0-I	other L2	136.093	3.02044	219	0.03146			st0-I	rest	117.526	1.66316	566	1.225e-05
st0-I	SMC	161.02	9.13419	21				st0-I	SMC	161.02	9.13419	21
st0-II	other L2	150.131	3.57481	238	0.18			st0-II	rest	125.519	1.86039	650	0.0008671
st0-II	SMC	170.297	11.3377	17				st0-II	SMC	170.297	11.3377	17
st0-III	other L2	134.716	2.8307	362	5.387e-05			st0-III	rest	131.716	1.60359	863	1.985e-05
st0-III	SMC	220.077	15.9553	11				st0-III	SMC	220.077	15.9553	11
st1-I	other L2	131.281	2.06568	655	3.432e-05
st1-I	SMC	218.556	22.5747	15
st1-II	other L2	133.082	2.6317	524	3.402e-05
st1-II	SMC	279.863	23.2727	11
st2-I	other L2	120.871	2.23669	586	1.083e-05
st2-I	SMC	397.542	54.8024	10
st2-II	other L2	119.489	2.78832	382	0.0005828
st2-II	SMC	770.013	81.5032	7
(*)= Wilcoxon rank sum test (unpaired) "SMC" against "Rest"
R script	data <- read.table("FILEPATH/VolumeSMC_Rest_Col.csv",sep=",", header=T)
	Stage<- subset(data,Stage=="NAMEofSTAGE_TO_TEST")
	wilcox.test(Mean~Viewpoints,data=Stage, paired=FALSE)

## Sheet: Figure2J_rawdata
Cell volume grouped by viewpoints L1= L1apical+L1basal+L1dome L2L3=L2apical+L2basal+CC+SMC+pSMC
Stage	Viewpoints	Stack	mean	sd	n
st0-I	L1	EM_C_149	109.07	9.90762	14
st0-I	L1	EM_C_237	114.931	5.27788	22
st0-I	L1	EM_C_240	83.4081	5.87816	20
st0-I	L1	EM_C_241	102.755	7.52532	15
st0-I	L1	EM_C_242A	104.405	7.27219	15
st0-I	L1	EM_C_243A	86.0387	4.43342	21
st0-I	L1	EM_C_243B	88.5367	6.75632	15
st0-I	L1	EM_C_244A	98.1271	4.73279	20
st0-I	L1	EM_C_245	107.978	5.44302	18
st0-I	L1	EM_C_25	114.213	7.23598	16
st0-I	L1	EM_C_354A	134.073	13.7091	13
st0-I	L1	EM_C_354B	126.693	8.93207	12
st0-I	L1	EM_C_377	114.458	6.27061	13
st0-I	L1	EM_C_378	79.1764	4.87706	20
st0-I	L1	EM_C_58	119.059	6.84948	19
st0-I	L1	EM_C_59	112.066	6.39332	17
st0-I	L1	EM_C_595	122.21	11.0494	11
st0-I	L1	EM_C_596	104.556	8.63075	12
st0-I	L1	EM_C_597	114.248	7.31172	16
st0-I	L1	EM_C_60	105.277	5.57605	23
st0-I	L1	EM_C_76	111.056	7.05358	15
st0-I	L2L3	EM_C_149	151.139	19.5221	13
st0-I	L2L3	EM_C_237	149.871	15.833	15
st0-I	L2L3	EM_C_240	139.538	11.517	10
st0-I	L2L3	EM_C_241	114.739	8.1076	11
st0-I	L2L3	EM_C_242A	140.695	15.4688	10
st0-I	L2L3	EM_C_243A	129.073	7.9465	15
st0-I	L2L3	EM_C_243B	134.867	11.9863	12
st0-I	L2L3	EM_C_244A	131.171	14.5505	11
st0-I	L2L3	EM_C_245	147.759	9.36692	10
st0-I	L2L3	EM_C_25	138.323	8.85629	14
st0-I	L2L3	EM_C_354A	149.459	13.1022	8
st0-I	L2L3	EM_C_354B	148.165	13.2505	12
st0-I	L2L3	EM_C_377	158.835	14.1564	10
st0-I	L2L3	EM_C_378	82.0034	10.1934	12
st0-I	L2L3	EM_C_58	150.843	11.3713	14
st0-I	L2L3	EM_C_59	137.725	9.62908	16
st0-I	L2L3	EM_C_595	140.184	16.6888	7
st0-I	L2L3	EM_C_596	138.383	18.7507	6
st0-I	L2L3	EM_C_597	121.049	12.842	9
st0-I	L2L3	EM_C_60	154.024	12.607	13
st0-I	L2L3	EM_C_76	144.34	11.2132	12
st0-II	L1	EM_C_146	93.0104	4.96417	26
st0-II	L1	EM_C_148	120.539	7.22933	31
st0-II	L1	EM_C_150	122.588	6.55379	30
st0-II	L1	EM_C_211	125.129	6.67415	17
st0-II	L1	EM_C_212A	125.306	8.36541	20
st0-II	L1	EM_C_212B	104.628	6.18216	25
st0-II	L1	EM_C_213	115.443	6.56821	23
st0-II	L1	EM_C_214	104.134	5.21176	25
st0-II	L1	EM_C_22	103.149	11.4774	27
st0-II	L1	EM_C_238	134.847	7.24738	23
st0-II	L1	EM_C_239	107.775	6.3099	25
st0-II	L1	EM_C_246	107.882	5.65655	23
st0-II	L1	EM_C_57	115.224	5.9787	26
st0-II	L1	EM_C_61	101.447	5.94824	20
st0-II	L1	EM_C_75	117.821	5.4846	22
st0-II	L1	EM_C_77	94.7477	6.80294	26
st0-II	L1	EM_C_78	103.194	5.97121	23
st0-II	L2L3	EM_C_146	137.815	11.7142	17
st0-II	L2L3	EM_C_148	171.838	14.8261	23
st0-II	L2L3	EM_C_150	164.553	13.3783	24
st0-II	L2L3	EM_C_211	162.161	13.2662	12
st0-II	L2L3	EM_C_212A	134.643	15.7808	17
st0-II	L2L3	EM_C_212B	169.894	13.0021	16
st0-II	L2L3	EM_C_213	159.03	15.7629	15
st0-II	L2L3	EM_C_214	159.185	12.985	12
st0-II	L2L3	EM_C_22	151.586	11.4593	15
st0-II	L2L3	EM_C_238	160.417	19.0016	10
st0-II	L2L3	EM_C_239	133.272	8.58081	15
st0-II	L2L3	EM_C_246	138.615	7.50381	11
st0-II	L2L3	EM_C_57	170.519	21.0159	9
st0-II	L2L3	EM_C_61	124.459	10.7342	10
st0-II	L2L3	EM_C_75	158.379	10.1975	17
st0-II	L2L3	EM_C_77	112.284	13.3198	14
st0-II	L2L3	EM_C_78	149.308	13.272	18
st0-III	L1	EM_C_136	125.88	5.89004	44
st0-III	L1	EM_C_138	119.668	5.1959	42
st0-III	L1	EM_C_139	119.1	5.55526	40
st0-III	L1	EM_C_140	110.369	5.41203	43
st0-III	L1	EM_C_141	122.635	5.81369	43
st0-III	L1	EM_C_142	132.659	6.38307	40
st0-III	L1	EM_C_187	127.599	5.21313	42
st0-III	L1	EM_C_202	146.777	5.90209	52
st0-III	L1	EM_C_399	157.477	7.08388	51
st0-III	L1	EM_C_403	116.505	5.56755	52
st0-III	L1	EM_C_6	137.85	5.42204	52
st0-III	L2L3	EM_C_136	154.925	8.38343	32
st0-III	L2L3	EM_C_138	109.21	10.6188	32
st0-III	L2L3	EM_C_139	149.154	10.758	30
st0-III	L2L3	EM_C_140	122.04	8.85416	38
st0-III	L2L3	EM_C_141	128.622	8.10789	36
st0-III	L2L3	EM_C_142	138.925	7.12679	32
st0-III	L2L3	EM_C_187	152.018	6.30425	27
st0-III	L2L3	EM_C_202	166.618	10.0602	30
st0-III	L2L3	EM_C_399	155.477	10.7125	36
st0-III	L2L3	EM_C_403	108.078	7.36642	44
st0-III	L2L3	EM_C_6	141.44	10.2059	36
st1-I	L1	EM_C_185	139.992	5.67353	64
st1-I	L1	EM_C_186	118.308	3.57396	68
st1-I	L1	EM_C_188	113.648	3.87726	61
st1-I	L1	EM_C_189	117.067	3.70952	58
st1-I	L1	EM_C_196	119.727	4.18762	58
st1-I	L1	EM_C_198	128.43	4.60623	55
st1-I	L1	EM_C_200	120.156	3.77484	75
st1-I	L1	EM_C_357A	134.679	5.41771	48
st1-I	L1	EM_C_357B	133.381	4.8177	46
st1-I	L1	EM_C_359A	123.035	4.23606	54
st1-I	L1	EM_C_359C	141.589	6.58019	55
st1-I	L1	EM_C_359D	139.54	5.02897	67
st1-I	L1	EM_C_400	123.615	4.77411	70
st1-I	L1	EM_C_404	113.99	5.85554	60
st1-I	L1	EM_C_406	129.575	5.98299	65
st1-I	L2L3	EM_C_185	140.212	7.72514	39
st1-I	L2L3	EM_C_186	138.284	9.85262	39
st1-I	L2L3	EM_C_188	121.785	5.338	50
st1-I	L2L3	EM_C_189	148.06	6.60951	40
st1-I	L2L3	EM_C_196	142.035	7.94083	42
st1-I	L2L3	EM_C_198	152.527	6.06194	38
st1-I	L2L3	EM_C_200	125.152	8.2456	48
st1-I	L2L3	EM_C_357A	119.783	8.64972	47
st1-I	L2L3	EM_C_357B	118.364	8.44605	42
st1-I	L2L3	EM_C_359A	110.05	6.67689	43
st1-I	L2L3	EM_C_359C	147.066	9.06486	47
st1-I	L2L3	EM_C_359D	159.357	7.7203	48
st1-I	L2L3	EM_C_400	130.057	8.57233	47
st1-I	L2L3	EM_C_404	140.617	10.0662	43
st1-I	L2L3	EM_C_406	115.294	7.93514	57
st1-II	L1	EM_C_102A	86.3867	3.67125	105
st1-II	L1	EM_C_112	97.8552	2.40662	99
st1-II	L1	EM_C_160	159.201	7.02494	73
st1-II	L1	EM_C_162	148.678	8.25087	77
st1-II	L1	EM_C_184	121.483	3.97174	78
st1-II	L1	EM_C_199	123.197	4.9983	72
st1-II	L1	EM_C_201	127.925	4.13933	78
st1-II	L1	EM_C_204	121.305	3.75474	68
st1-II	L1	EM_C_359B	161.506	5.91419	63
st1-II	L1	EM_C_607	126.2	4.12771	79
st1-II	L1	EM_C_96	111.266	3.88521	75
st1-II	L2L3	EM_C_102A	91.3246	5.04867	60
st1-II	L2L3	EM_C_112	116.542	6.36385	51
st1-II	L2L3	EM_C_160	194.028	11.0382	44
st1-II	L2L3	EM_C_162	170.051	10.7924	53
st1-II	L2L3	EM_C_184	141.169	9.75053	35
st1-II	L2L3	EM_C_199	151.223	7.01254	40
st1-II	L2L3	EM_C_201	150.708	7.21174	45
st1-II	L2L3	EM_C_204	138.77	10.4606	36
st1-II	L2L3	EM_C_359B	143.847	8.12808	57
st1-II	L2L3	EM_C_607	142.012	7.33588	49
st1-II	L2L3	EM_C_96	91.0039	6.40705	65
st2-I	L1	EM_C_101	93.1588	3.26024	97
st2-I	L1	EM_C_102B	97.7424	3.72019	97
st2-I	L1	EM_C_113	104.328	3.75318	84
st2-I	L1	EM_C_130	122.34	4.42238	98
st2-I	L1	EM_C_157	135.989	6.59032	74
st2-I	L1	EM_C_159	145.898	5.6894	74
st2-I	L1	EM_C_161	133.941	5.75644	81
st2-I	L1	EM_C_191	120.511	5.56753	98
st2-I	L1	EM_C_229	126.518	4.21845	102
st2-I	L1	EM_C_232	123.543	3.82406	106
st2-I	L2L3	EM_C_101	90.4677	4.55591	79
st2-I	L2L3	EM_C_102B	118.325	5.93251	56
st2-I	L2L3	EM_C_113	108.915	6.65122	54
st2-I	L2L3	EM_C_130	140.666	10.2439	54
st2-I	L2L3	EM_C_157	135.202	10.7907	55
st2-I	L2L3	EM_C_159	127.163	10.8476	48
st2-I	L2L3	EM_C_161	165.214	11.2591	55
st2-I	L2L3	EM_C_191	125.679	6.30308	74
st2-I	L2L3	EM_C_229	113.603	6.76617	68
st2-I	L2L3	EM_C_232	149.125	12.1272	53
st2-II	L1	EM_C_128	140.591	4.28955	119
st2-II	L1	EM_C_129	117.453	3.73007	117
st2-II	L1	EM_C_132	116.836	4.17935	91
st2-II	L1	EM_C_230	119.748	3.61486	94
st2-II	L1	EM_C_254	118.62	4.31934	93
st2-II	L1	EM_C_352	138.213	3.98106	132
st2-II	L1	EM_C_81	109.573	4.72762	115
st2-II	L2L3	EM_C_128	172.211	18.3865	52
st2-II	L2L3	EM_C_129	122.798	19.8457	49
st2-II	L2L3	EM_C_132	125.393	10.2827	52
st2-II	L2L3	EM_C_230	112.07	7.68887	62
st2-II	L2L3	EM_C_254	124.586	13.2597	49
st2-II	L2L3	EM_C_352	139.978	12.7298	70
st2-II	L2L3	EM_C_81	121.655	15.0027	55

## Sheet: Figure 2J_Table
Cell volume data grouped per ovule
	Mean.L1	(std)	Mean.L2L3	(std)	n(ovules)	P value*
st0-I	107.254	14.1245	137.565	16.8129	21	9.537e-07
st0-II	112.104	11.8641	150.541	18.0082	16	1.526e-05
st0-III	125.624	15.5609	139.489	19.7559	11	0.06738
* Wilcoxon signed rank test (paired)
R script:	data <- read.table("FILEPATH/VolumeL1L2_perOvule_All.csv",sep=",", header=T)
	stage<-subset(data,Stage=="NAMEofSTAGE_TOTEST")
	wilcox.test(stage$L1,stage$L2, paired=TRUE)

## Sheet: Figure 2K_rawdata
	Angle (*) with z axis			(*): angle between the anisotropy vector of the SMC and the primordium axis
Ovule # (st0-II)	r (radiants)	° (deg)		see STAR Methods
EM_C_22	0.394762	22.6182
EM_C_57	0.239364	13.7145
EM_C_61	0.300857	17.2378
EM_C_75	0.240408	13.7743
EM_C_77	1.22329	70.0892
EM_C_77	0.784553	44.9516
EM_C_78	0.0410638	2.35278
EM_C_78	0.296975	17.0154
EM_C_146	0.108718	6.22909
EM_C_148	0.602651	34.5293
EM_C_148	0.445062	25.5002
EM_C_150	0.432497	24.7803
EM_C_211	0.400364	22.9392
EM_C_212_ov1	0.266441	15.266
EM_C_212_ov2	0.49327	28.2623
EM_C_238	0.538297	30.8421
EM_C_238	1.37325	78.6813
EM_C_239	0.683269	39.1484

[truncated: 2 more sheets: FigureS2F_rawdata, FigureS2F_Table]
