# Supplementary material for: Organ geometry channels reproductive cell fate in the Arabidopsis ovule primordium
Source: eLife journal article supplement (doi:10.7554/elife.66031), 2021-05-07
Supplement: supp [file elife-66031-supp-v1.zip › elife_poa_e66031_Figure_5_figure_supplement_1.pdf]

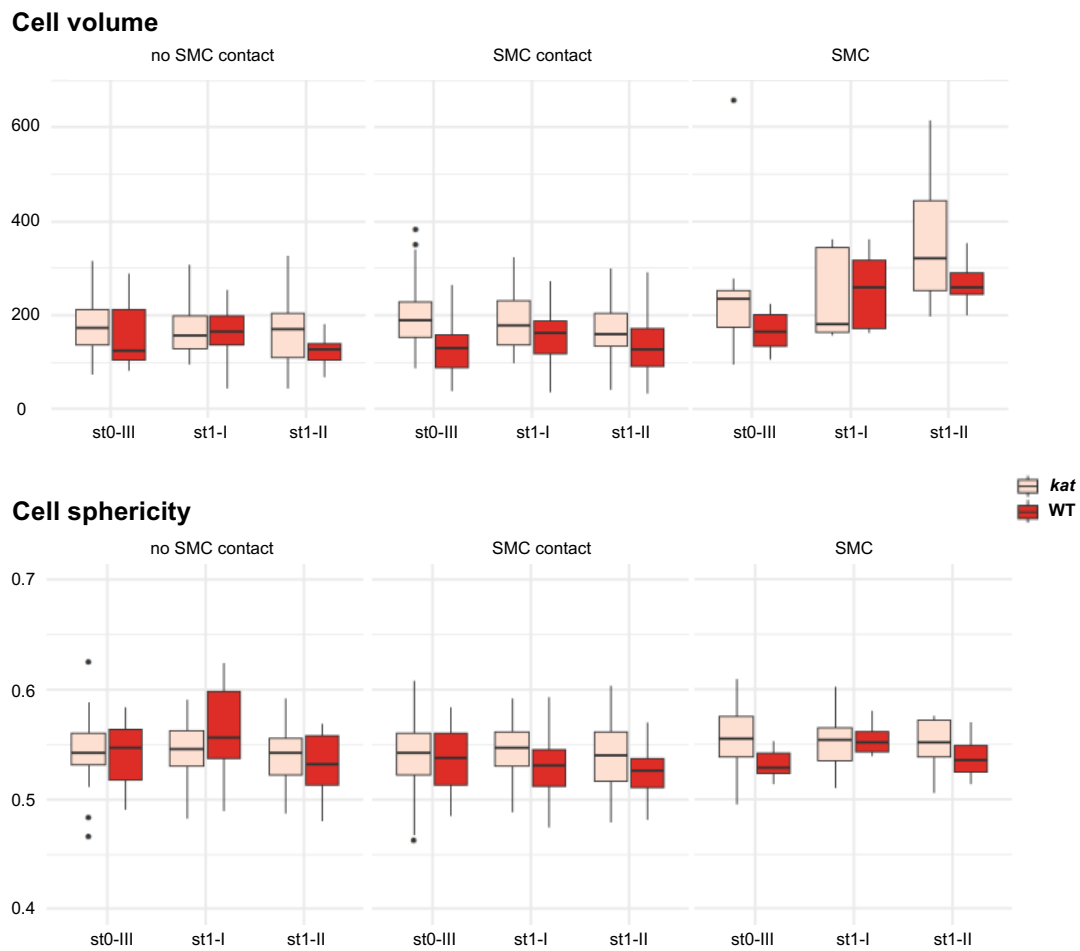

**Figure 5 – figure supplement 1. Cell volume and sphericity of SMC and SMC neighbors in *katanin*.**

Comparison of volume and sphericity of L2,L3 apical domain cells in wild-type (WT, *Ws-4*) and *katanin* (*kat*, *bot1.7* allele). Mann Whitney U test was used to assess the differences between genotypes for the mean cell volume and sphericity visualized by boxplots. Related to [Figure 5B](#).
