# Supplementary material for: Organ geometry channels reproductive cell fate in the Arabidopsis ovule primordium
Source: eLife journal article supplement (doi:10.7554/elife.66031), 2021-05-07
Supplement: supp [file elife-66031-supp-v1.zip › elife_poa_e66031_Figure_5_source_data_1.xlsx]

## Sheet: Figure5D-F_Figure sup2A-D_Table
Analysis of SMC and female gemtophyte markers in wild type and katanin ovule primordia.
p values ≤ 0.05
	Stages:	0-III					1-I					1-II					2-I					2-II					2-III to 2-IV (meiosis)						3-I (meiosis tetrad)						FG1 (post meiosis)					FG2 (post meiosis)					FG4-FG7 (post meiosis)
Marker	Genotype	ectopic (frequency)	n (ovules)	N (plants)	SE	p-value	ectopic (frequency)	n (ovules)	N (plants)	SE	p-value	ectopic (frequency)	n (ovules)	N (plants)	SE	p-value	ectopic (frequency)	n (ovules)	N (plants)	SE	p-value	ectopic (frequency)	n (ovules)	N (plants)	SE	p-value	ectopic (frequency)	absent (frequency)	n (ovules)	N (plants)	SE	p-value	ectopic (frequency)	absent (frequency)	n (ovules)	N (plants)	SE	p-value	ectopic (frequency)	n (ovules)	N (plants)	SE	p-value	ectopic (frequency)	n (ovules)	N (plants)	SE	p-value	ectopic (frequency)
pH1.1:H1.1:GFP	Col	0	39	4	0	-	0	35	4	9.86	-	4.87	43	4	4.54	-	5.71	37	4	3.61	-	0	35	4	0	-	0		32	3	0	-						-					-					-
	mad5	0	31	3	0	1	22.58	31	3	15.47	0.01154	28.57	42	3	6.4	0.01885	58.62	29	3	7.77	0.00058	8	25	2	0.32	0.18561	11.42		35	2	0.32
	lue1																31.14	31	2	1.169	0.00840
pKNU:nls:YFP	Col	0	94	4	0	-	3.84	104	4	0.36	-	5.68	88	4	0.52	-	3.7	108	3	1.38	-	1.21	82	3	0.83	-	0		35	3	0	-						-					-					-
	mad5	0	56	4	0	1	7.81	64	5	3.22	0.0037	20.93	43	3	6.23	0.003	11.81	127	4	4.09	1.188 e-6	6.75	74	3	3.5	0.1694	7.4		54	3	6.06	0.1152
												1-II - 2- I (pulled)
	Ws (WT cosegregant)											1.79	469	3	0.01
	bot1.7											12.82	127	3	0.001	1.421e-8
pDMC1:GUS	Col					-					-					-					-					-	9.59		169	4	5.59	-											-					-
	lue1																										55.93		99	4	3.66	2.293e-16
	Ws (WT cosegregant)					-					-					-					-					-	0		13	1	nd	-											-					-
	bot1.7																										52.7		55	1	nd	0.00765
Aniline Blue	Col																										0	7.21649	97	3	0.49		0	6.93069	101	3	0.52
	lue1																										0	32.6531	70	2	0.7	0.00003	0	32.6531	49	3	1.22	0.00013
	Ws (WT cosegregant)																										0	10.3448	96	4	0.76		0	10	160	4	0.56
	bot1.7																										0	30.9524	84	3	1.4	0.00110	0	22.7027	185	6	0.67	0.00223
pWOX2:CenH3:GFP	Ws (introgressed)					-					-					-					-					-													6.47	37	2	0.96	-	6.47	37	2	0.96	-	6.47
	bot1.7																																						29.91	52	2	1.8	0.0177	29.91	52	2	1.8	0.0177	29.91
pAKV:H2B:GFP	Ws (WT cosegregant)					-					-					-					-					-													10.53	38	6	0.53		1.96	51	5	0.94		0
	bot1.7																																						30.91	55	5	0.82	0.0242	10.63	47	5	0.57	0.1016	0
			-
[truncated: 4 more columns]
